# Supplementary material for: Parameter estimation in models of biological oscillators: an automated regularised estimation approach
Source: PubMed Central journal article supplement (PMC6377730; doi:10.1186/s12859-019-2630-y), 2019-02-15
Supplement: 12859_2019_2630_MOESM3_ESM.pdf [file 12859_2019_2630_MOESM3_ESM.pdf]

# Additional file 3 for “Parameter estimation in models of biological oscillators: an automated regularised estimation approach.”

Jake Alan Pitt<sup>1,2</sup> and Julio R. Banga<sup>1\*</sup>

**1** (Bio)Process Engineering Group, Spanish National Research Council, IIM-CSIC, C/Eduardo Cabello 6, 36208, Vigo, Spain

**2** RWTH-Aachen University Hospital, Joint Research Centre for Computational Biomedicine (JRC-COMBINE), 52074, Aachen, Germany

\*Correspondence should be directed to Prof J. R. Banga at julio@iim.csic.es

## S3.1 FHN case study results

Detailed results for the FHN problem can be found here.

**Table S3.1:** FHN case study: summary of the regularised results for the fit to the first fitting data set.

| Parameter | Value  | Confidence (95%) | Coeff of variation (%) | Bounds status     |
|-----------|--------|------------------|------------------------|-------------------|
| a         | 0.1069 | $\pm 0.0129$     | 6.1732                 | bounds not active |
| b         | 0.6230 | $\pm 0.0551$     | 4.5130                 | bounds not active |
| g         | 2.8490 | $\pm 0.1528$     | 2.7370                 | bounds not active |

**Table S3.2:** FHN case study: NRMSE values for the fitting for each fitting data set, with and without regularisation.

|                | Regularised | Non-regularised |
|----------------|-------------|-----------------|
| Fitting set 1  | 0.25758     | 0.10946         |
| Fitting set 2  | 0.15195     | 0.13496         |
| Fitting set 3  | 0.13739     | 0.10707         |
| Fitting set 4  | 0.36033     | 0.35877         |
| Fitting set 5  | 0.15546     | 0.15081         |
| Fitting set 6  | 0.33357     | 0.19166         |
| Fitting set 7  | 0.16416     | 0.14013         |
| Fitting set 8  | 0.14951     | 0.14013         |
| Fitting set 9  | 0.33509     | 0.23065         |
| Fitting set 10 | 0.14415     | 0.092268        |

**Table S3.3:** FHN case study: NRMSE values for the cross-validation for each regularised fit to the fitting data. Here, CV denotes cross-validation data set and F denotes fitting data set.

|        | F 1     | F 2     | F 3     | F 4     | F 5     | F 6     | F 7     | F 8     | F 9     | F 10    |
|--------|---------|---------|---------|---------|---------|---------|---------|---------|---------|---------|
| All CV | 1.4054  | 0.91342 | 1.568   | 1.4546  | 1.2945  | 1.1086  | 0.86025 | 0.86489 | 1.1237  | 1.1708  |
| CV 1   | 0.28611 | 0.26098 | 0.36268 | 0.2937  | 0.33965 | 1.488   | 0.43269 | 0.3478  | 0.86801 | 0.55886 |
| CV 2   | 0.36751 | 0.26046 | 0.80114 | 0.72955 | 0.28107 | 1.0501  | 0.26559 | 0.25614 | 0.25908 | 0.25826 |
| CV 3   | 3.0809  | 1.1165  | 1.714   | 1.6787  | 2.638   | 0.43453 | 0.73987 | 0.89282 | 1.771   | 2.0556  |
| CV 4   | 0.34174 | 0.26721 | 1.6694  | 1.1571  | 1.1178  | 1.1642  | 0.22251 | 0.24208 | 0.73597 | 0.60221 |
| CV 5   | 0.20409 | 0.59013 | 1.1545  | 0.97321 | 0.55936 | 0.29394 | 0.5212  | 0.55169 | 0.43116 | 0.26306 |
| CV 6   | 0.41283 | 0.26985 | 0.47756 | 0.41991 | 0.28595 | 0.45085 | 0.8041  | 0.53152 | 0.22888 | 0.25147 |
| CV 7   | 0.42833 | 0.32626 | 0.59312 | 0.50113 | 0.49843 | 1.123   | 0.41085 | 0.36075 | 0.65653 | 0.50676 |
| CV 8   | 1.768   | 1.6869  | 2.8185  | 2.5564  | 1.811   | 1.7919  | 1.6536  | 1.6749  | 1.7928  | 1.7777  |
| CV 9   | 2.0913  | 1.7997  | 2.3005  | 2.3232  | 1.5431  | 1.2677  | 1.5819  | 1.643   | 1.7503  | 1.8216  |
| CV 10  | 1.4248  | 0.52681 | 1.7146  | 1.7539  | 1.432   | 1.0294  | 0.47094 | 0.46519 | 1.0868  | 1.369   |

**Table S3.4:** FHN case study: NRMSE values for the cross-validation for each non-regularised fit to the fitting data. Here, CV denotes cross-validation data set and F denotes fitting data set.

|        | F 1     | F 2     | F 3     | F 4     | F 5     | F 6     | F 7     | F 8     | F 9     | F 10    |
|--------|---------|---------|---------|---------|---------|---------|---------|---------|---------|---------|
| All CV | 1.4487  | 1.014   | 1.8203  | 1.477   | 1.3133  | 1.4451  | 0.91002 | 0.91003 | 1.3498  | 1.2337  |
| CV 1   | 1.8314  | 0.20565 | 1.0443  | 1.8248  | 0.41676 | 1.9123  | 0.267   | 0.26699 | 1.8291  | 1.5215  |
| CV 2   | 1.2531  | 0.28248 | 1.5143  | 1.8397  | 0.27679 | 1.4588  | 0.25943 | 0.25943 | 1.3418  | 0.84382 |
| CV 3   | 1.2542  | 1.3358  | 1.8885  | 1.7733  | 2.6426  | 0.96563 | 1.1034  | 1.1034  | 0.49304 | 1.2277  |
| CV 4   | 1.1977  | 0.27866 | 1.8943  | 1.3328  | 1.0492  | 1.3448  | 0.26551 | 0.26551 | 1.2445  | 1.1271  |
| CV 5   | 0.41586 | 0.62773 | 1.7784  | 0.46052 | 0.49988 | 0.46931 | 0.58233 | 0.58234 | 0.27744 | 0.20587 |
| CV 6   | 1.0829  | 0.17287 | 0.60911 | 1.4717  | 0.27555 | 1.3408  | 0.28431 | 0.28429 | 1.1618  | 0.38201 |
| CV 7   | 1.77    | 0.32797 | 0.78361 | 1.3261  | 0.49309 | 1.9461  | 0.32668 | 0.32668 | 1.7165  | 1.2299  |
| CV 8   | 2.088   | 1.6977  | 2.8868  | 0.42949 | 1.794   | 1.7651  | 1.6845  | 1.6845  | 1.8181  | 1.7687  |
| CV 9   | 1.7618  | 1.9688  | 2.4778  | 1.3499  | 1.7549  | 1.2703  | 1.7922  | 1.7922  | 1.5445  | 1.7259  |
| CV 10  | 1.0548  | 1.0038  | 1.9941  | 2.0094  | 1.43    | 1.3496  | 0.52789 | 0.52788 | 1.1039  | 1.2681  |

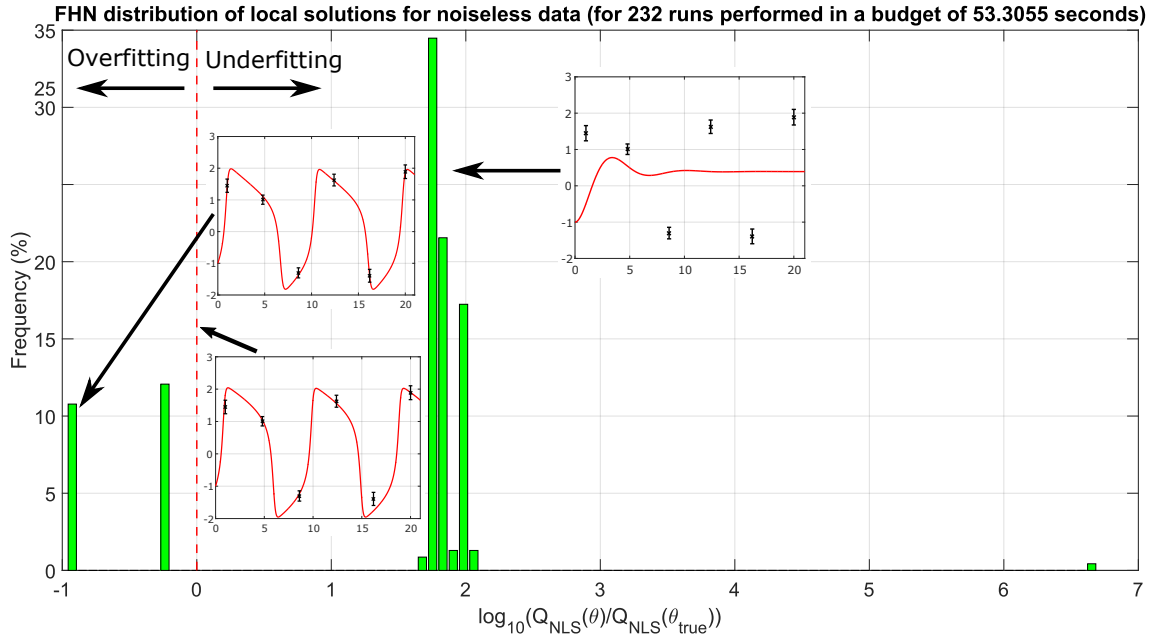

**Figure S3.1:** FHN case study: distribution of solutions found using the nl2sol local solver with examples of local solutions and overfitting for the first fitting data set.

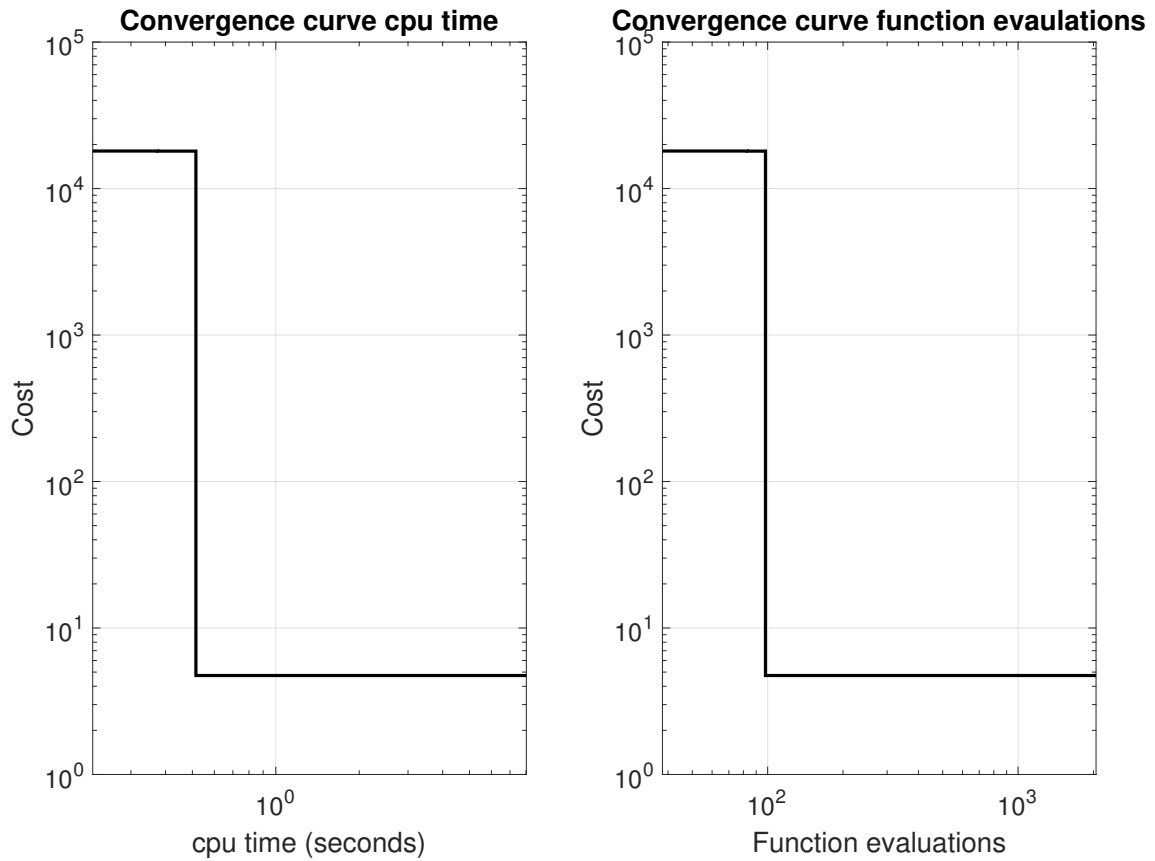

**Figure S3.2:** FHN case study: convergence curve of the final regularised estimation for the first fitting data set.

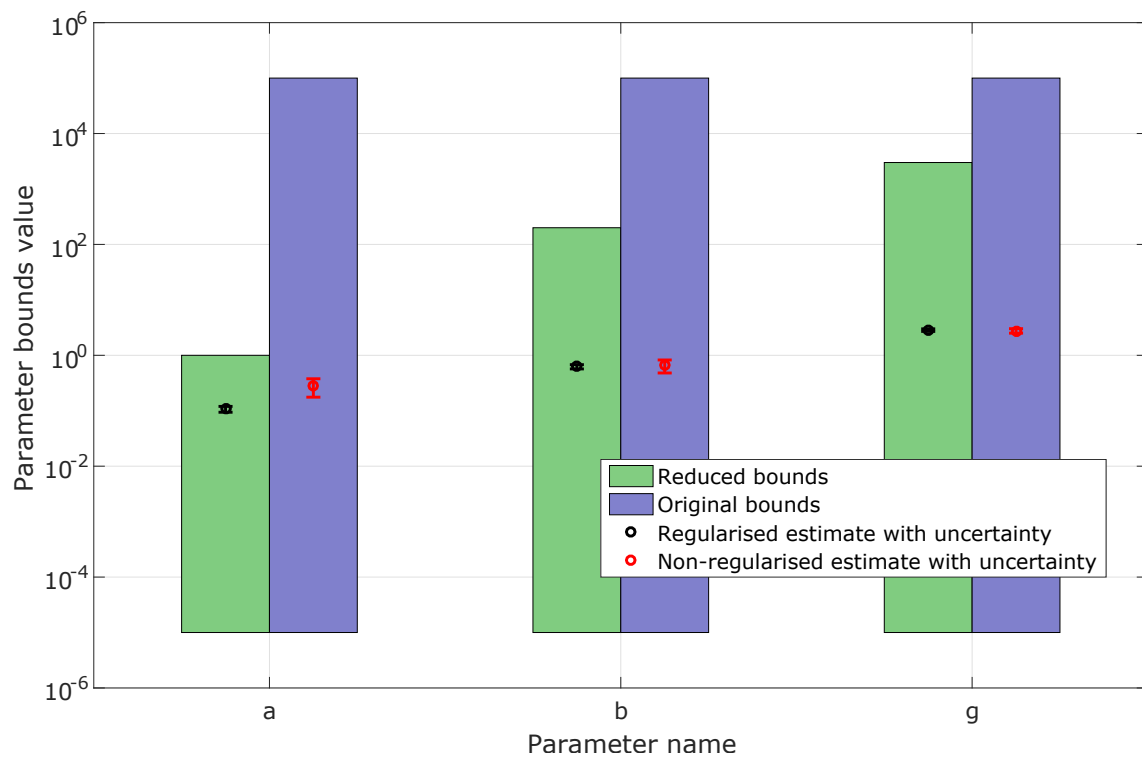

**Figure S3.3:** FHN case study: reduction in the parameter bounds with the estimated values and their 95% confidence intervals for the first fitting data set.

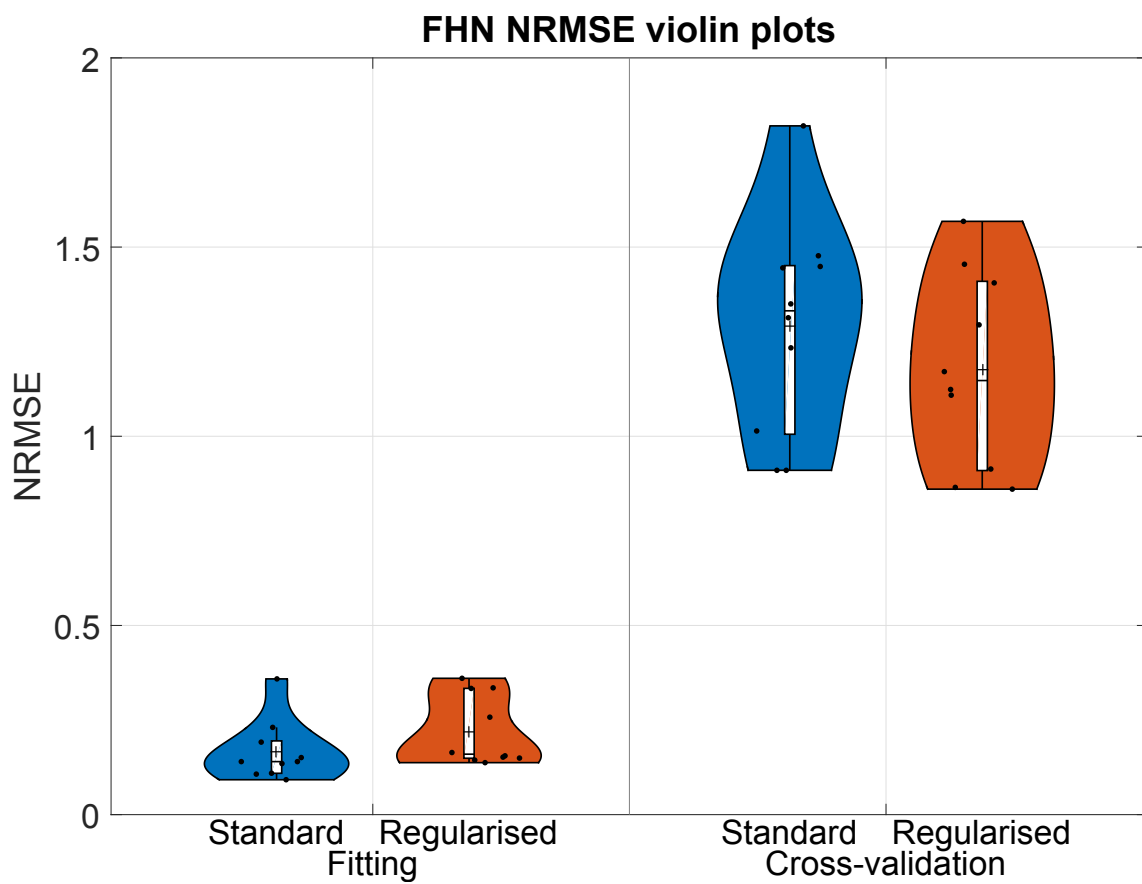

**Figure S3.4:** FHN case study: violin plots showing the distribution of the NRMSE values for the fit and cross-validation for all the data sets considered, both with and without regularisation.

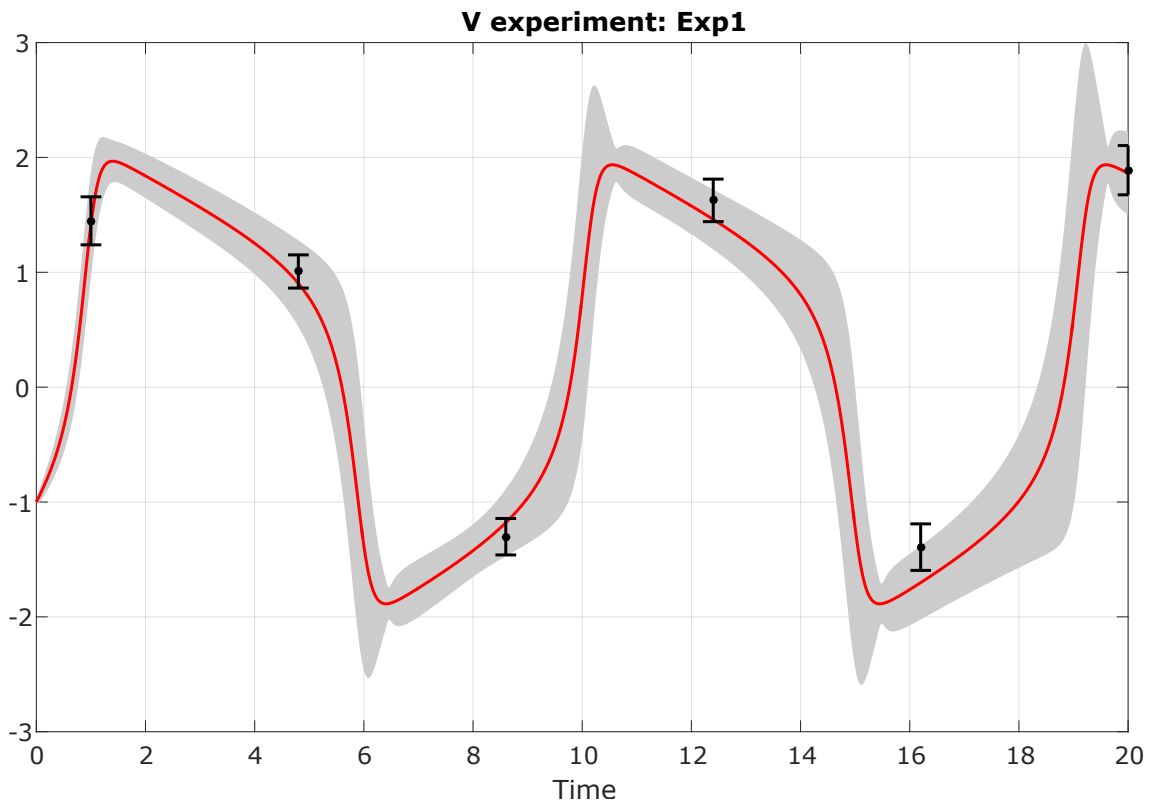

**Figure S3.5:** FHN case study: final regularised fit with uncertainty intervals for the first fitting data set.

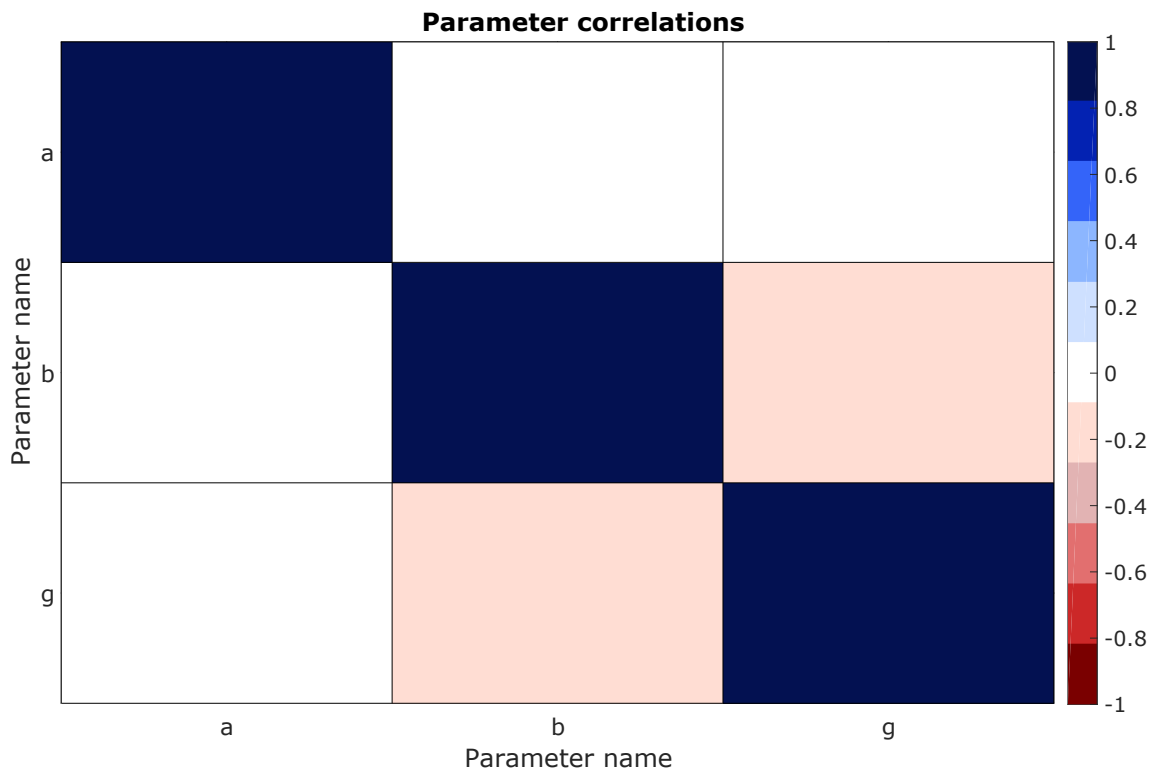

**Figure S3.6:** FHN case study: parameter correlation matrix for the final estimated regularised solution for the first fitting data set.

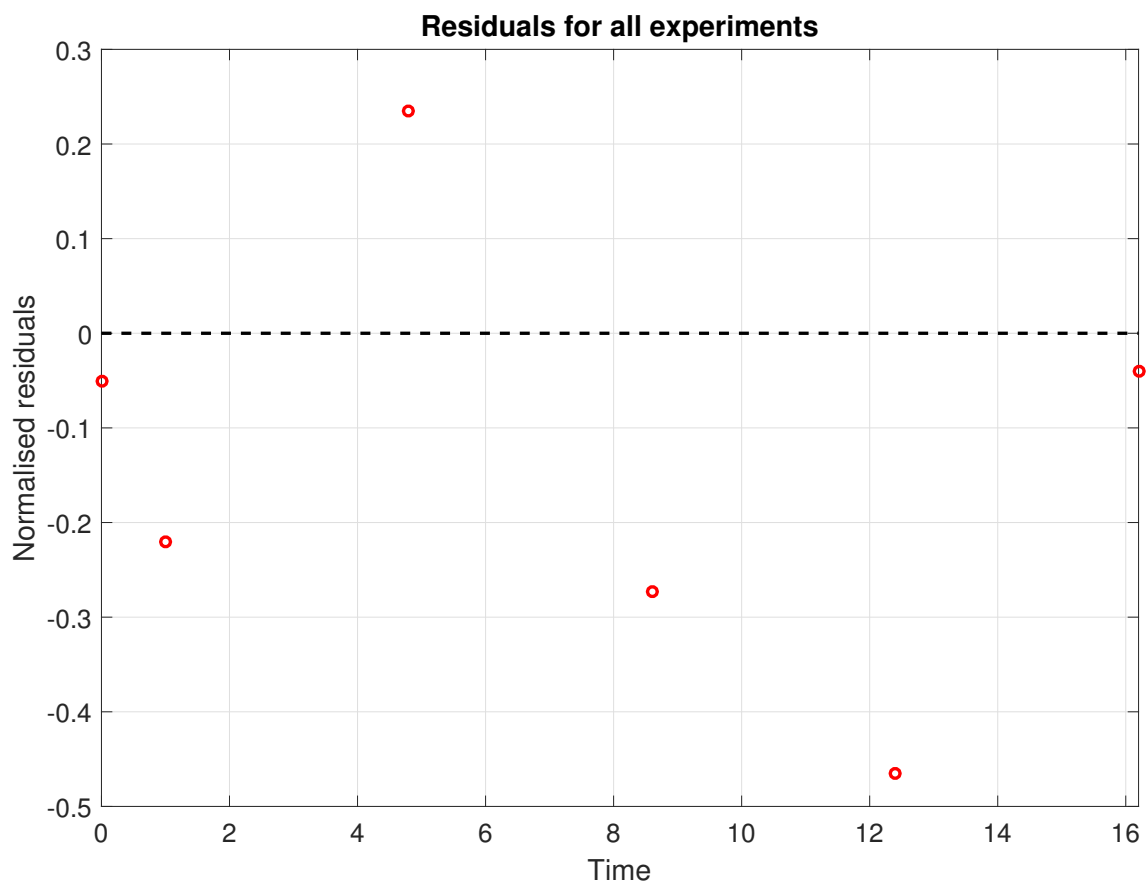

**Figure S3.7:** FHN case study: normalised residuals for the regularised fit for the first fitting data set.



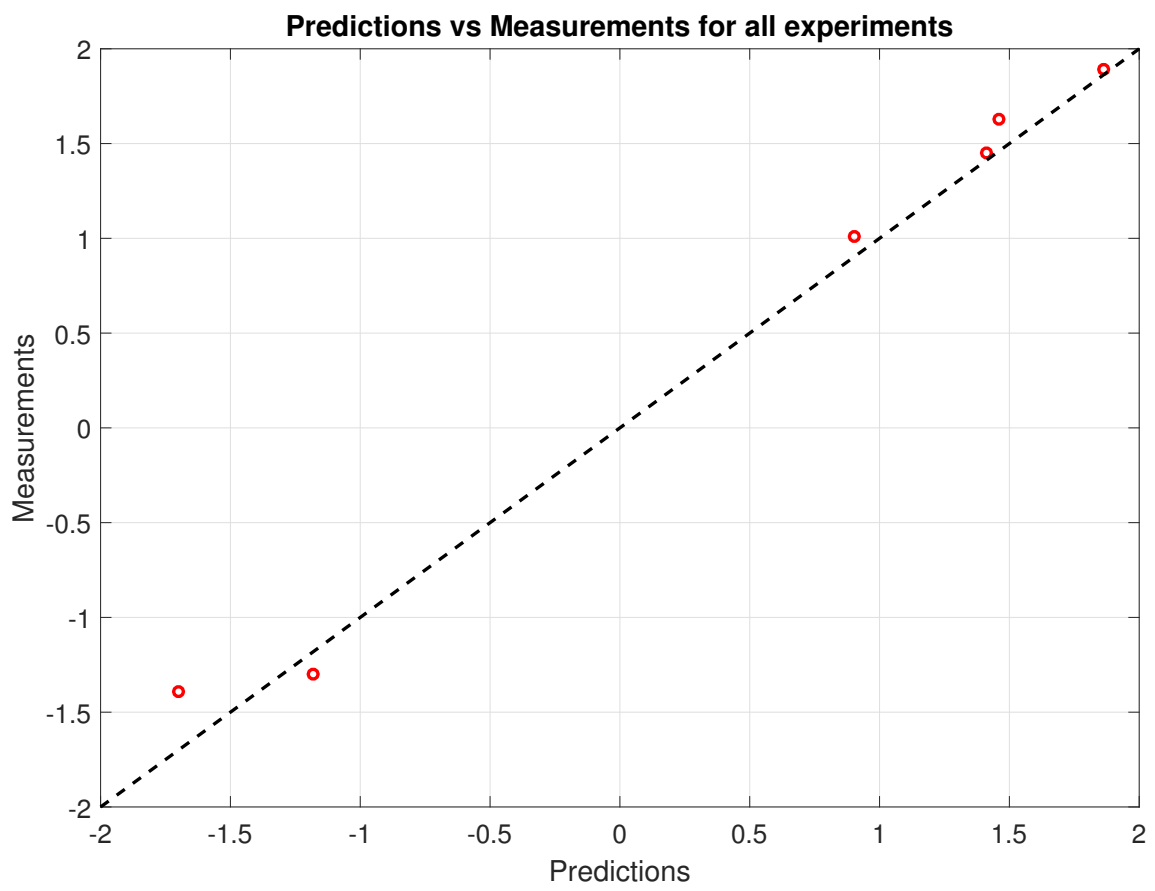

**Figure S3.8:** FHN case study: predicted versus observed values for the first fitting data set.

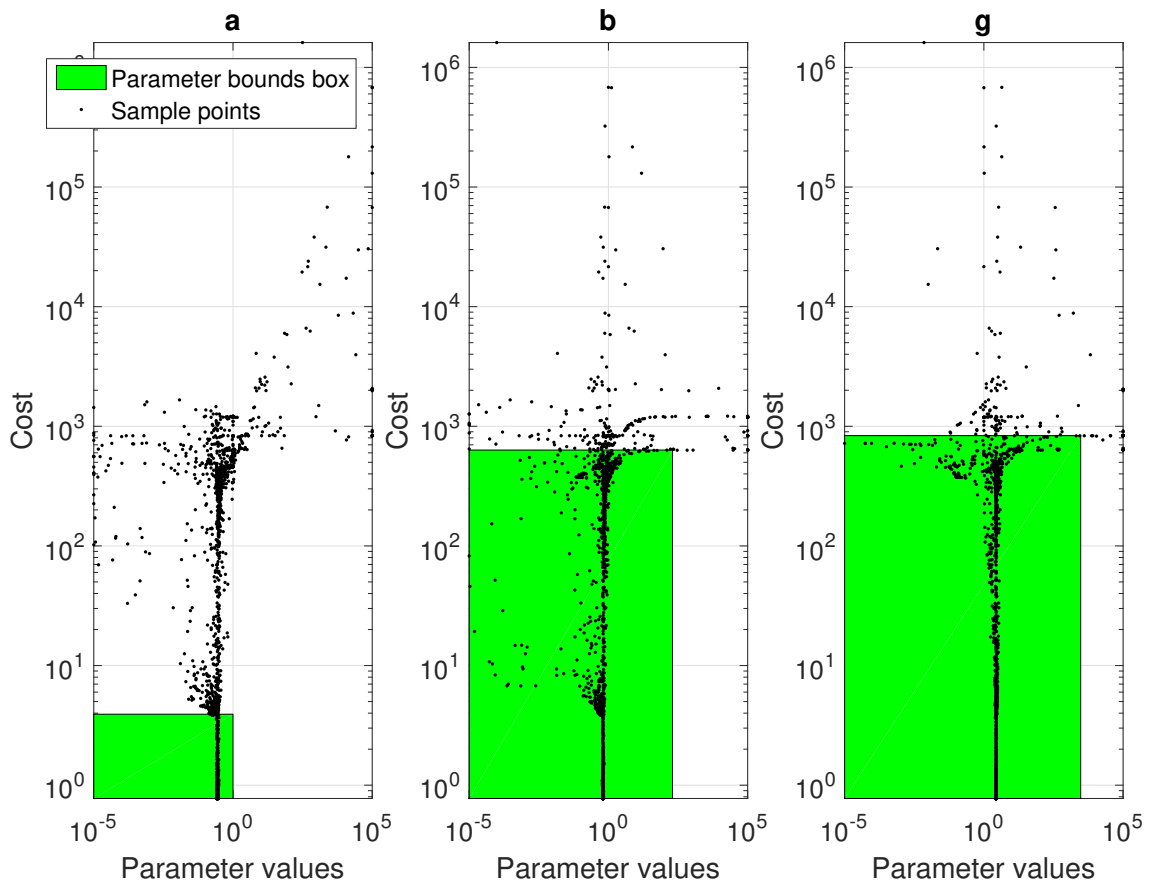

**Figure S3.9:** FHN case study: sample from the initial estimation with the new parameter bound box, where the height of said box is the cost cut off for the first fitting data set.

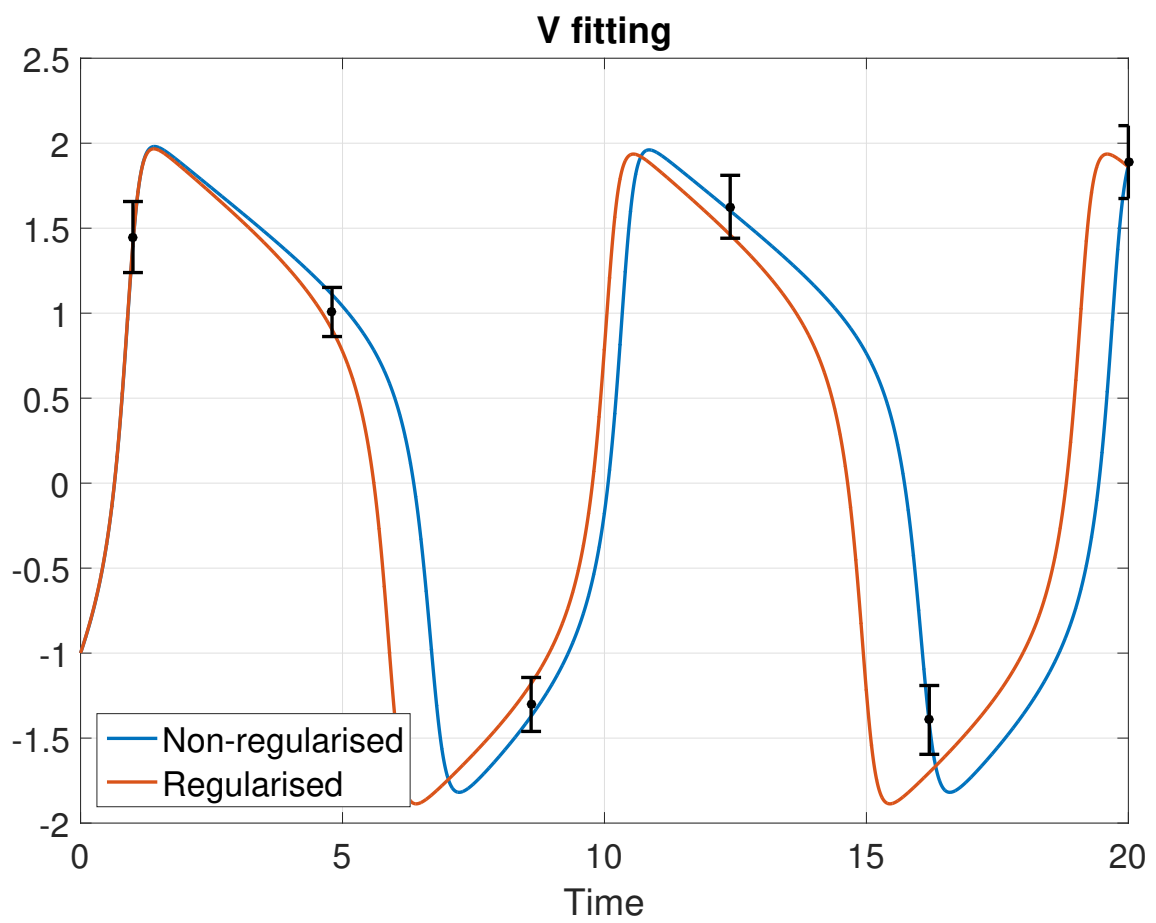

**Figure S3.10:** FHN case study: comparison of the fits with and without regularisation for the first fitting data set.

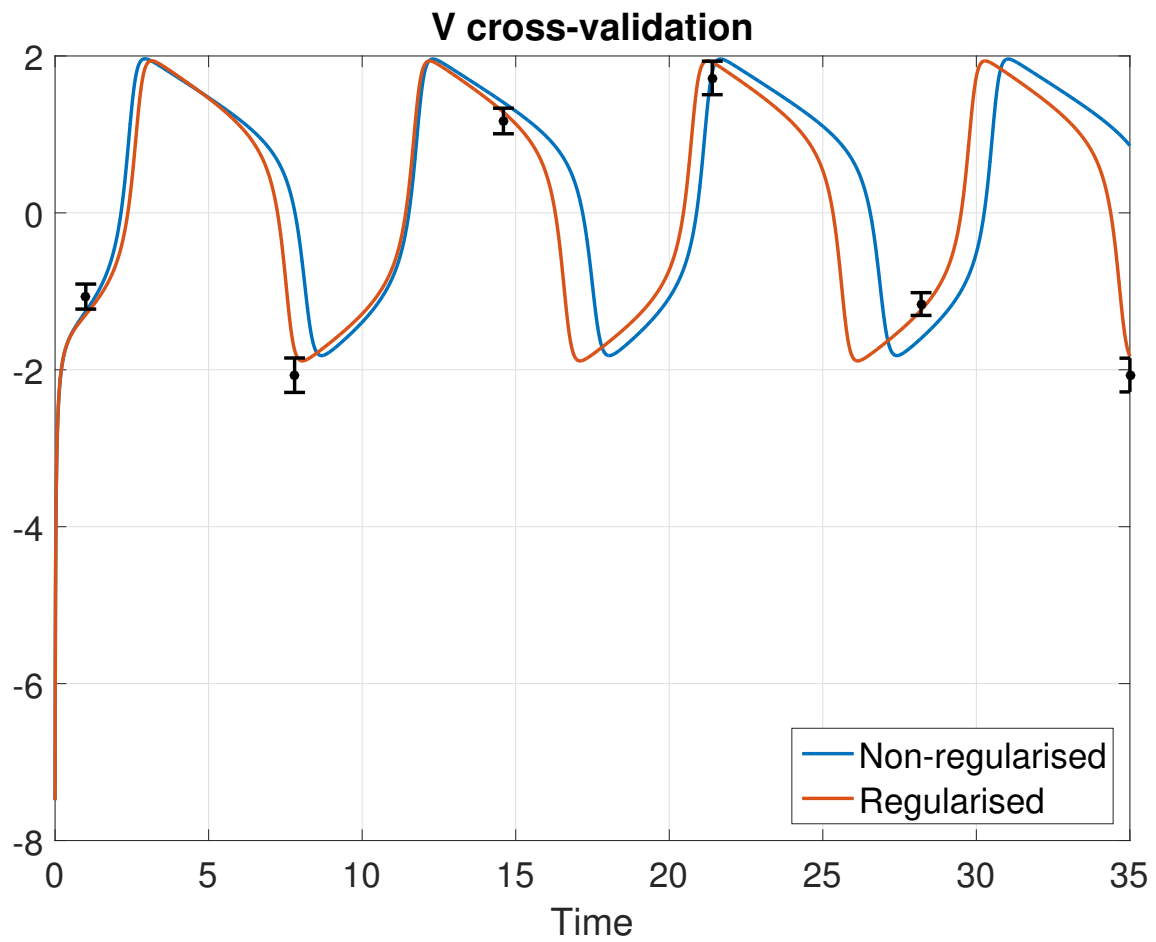

**Figure S3.11:** FHN case study: comparison of the cross-validation with and without regularisation for the fit to the first fitting data set.

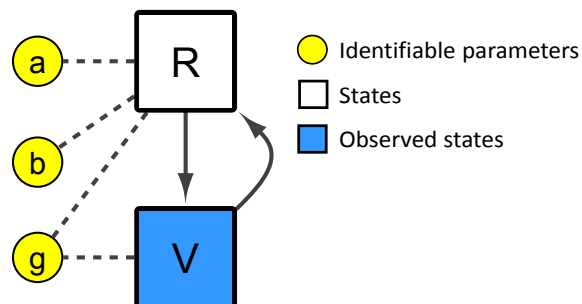

**Figure S3.12:** FHN case study: results of the VisId analysis performed at the regularised solution for the first fitting data set.

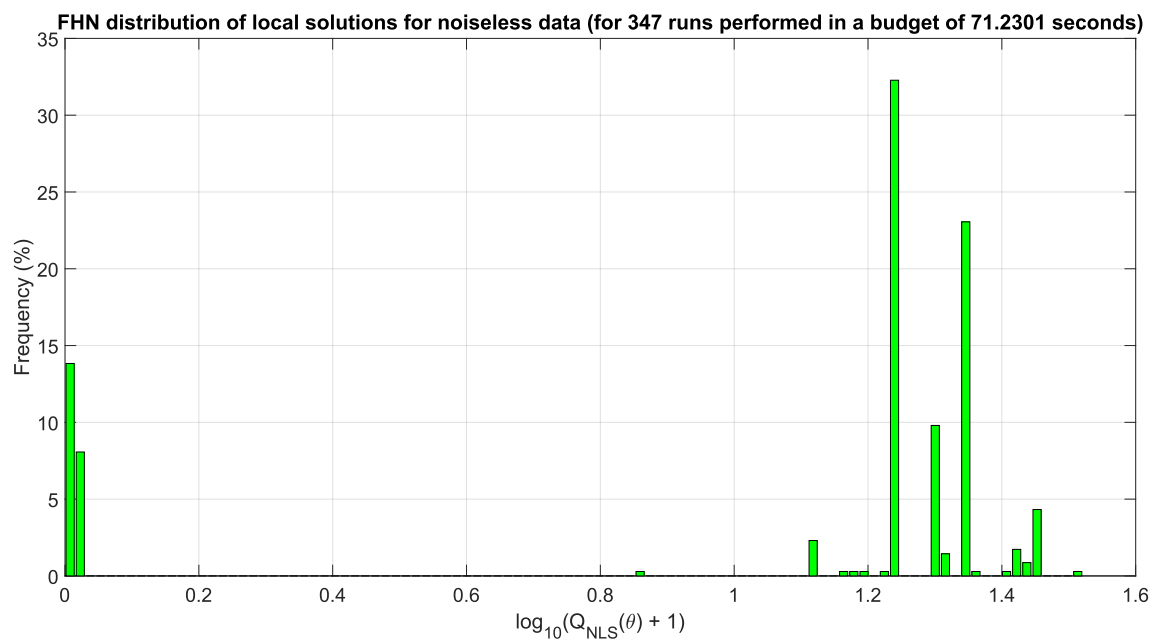

**Figure S3.13:** FHN case study: distribution of solutions found using the nl2sol local solver fitting to noiseless data.

## S3.2 RP problem results

Detailed results for the RP case study can be found [here](#).

**Table S3.5:** RP case study: summary of the regularised results for the regularised fit to the first fitting data set.

| Parameter  | Value      | Confidence (95%) | Coeff of variation (%) | Bounds status      |
|------------|------------|------------------|------------------------|--------------------|
| $\alpha_0$ | 1.0000e-03 | $\pm 0.0339072$  | 1729.9568              | Lower bound active |
| $\alpha$   | 305.8607   | $\pm 23.1333$    | 3.8588457              | Bounds not active  |
| $n$        | 8.7759     | $\pm 1.9681$     | 11.441934              | Bounds not active  |
| $\beta$    | 0.2979     | $\pm 0.0110613$  | 1.8941222              | Bounds not active  |

**Table S3.6:** RP case study: NRMSE values for the fitting for each fitting data set, with and without regularisation.

|                | Regularised | Non-regularised |
|----------------|-------------|-----------------|
| Fitting set 1  | 0.003058    | 0.0029454       |
| Fitting set 2  | 0.0037345   | 0.0028245       |
| Fitting set 3  | 0.0028395   | 0.0020954       |
| Fitting set 4  | 0.0041512   | 0.0028835       |
| Fitting set 5  | 0.0032896   | 0.0031589       |
| Fitting set 6  | 0.0026429   | 0.0022547       |
| Fitting set 7  | 0.0025042   | 0.0024369       |
| Fitting set 8  | 0.0043533   | 0.0032509       |
| Fitting set 9  | 0.0025147   | 0.0024138       |
| Fitting set 10 | 0.0042353   | 0.0031773       |

**Table S3.7:** RP case study: NRMSE values for the cross-validation for each regularised fit to the fitting data. Here, CV denotes cross-validation data set and F denotes fitting data set.

|        | F 1       | F 2       | F 3       | F 4       | F 5       | F 6       | F 7       | F 8       | F 9       | F 10      |
|--------|-----------|-----------|-----------|-----------|-----------|-----------|-----------|-----------|-----------|-----------|
| All CV | 0.010209  | 0.011113  | 0.013345  | 0.013072  | 0.0073395 | 0.006618  | 0.0067622 | 0.011761  | 0.016007  | 0.014158  |
| CV 1   | 0.011846  | 0.010615  | 0.011641  | 0.010473  | 0.011112  | 0.011585  | 0.011339  | 0.011809  | 0.0046423 | 0.011804  |
| CV 2   | 0.003409  | 0.0051609 | 0.0055662 | 0.0055686 | 0.0042063 | 0.004572  | 0.0048925 | 0.0074889 | 0.0031253 | 0.0086631 |
| CV 3   | 0.0067989 | 0.01077   | 0.0075154 | 0.012043  | 0.0047154 | 0.0080207 | 0.0076951 | 0.0093117 | 0.013872  | 0.011688  |
| CV 4   | 0.0040396 | 0.0050636 | 0.0063911 | 0.006645  | 0.0047813 | 0.0048151 | 0.0052343 | 0.008304  | 0.0031452 | 0.0096835 |
| CV 5   | 0.0037767 | 0.0036489 | 0.0052823 | 0.0067779 | 0.0036562 | 0.0031405 | 0.0034838 | 0.0050485 | 0.0054189 | 0.0079453 |
| CV 6   | 0.0052017 | 0.0039615 | 0.0073469 | 0.011046  | 0.0040974 | 0.0034755 | 0.0037729 | 0.0058516 | 0.0045806 | 0.011809  |
| CV 7   | 0.013594  | 0.0063302 | 0.013315  | 0.012401  | 0.012545  | 0.0059882 | 0.0094579 | 0.013114  | 0.016906  | 0.013142  |
| CV 8   | 0.01212   | 0.026341  | 0.020987  | 0.018921  | 0.0067046 | 0.0062312 | 0.0054291 | 0.020987  | 0.036561  | 0.019947  |
| CV 9   | 0.0043431 | 0.0051425 | 0.0058978 | 0.0059951 | 0.0048345 | 0.0049428 | 0.0052041 | 0.007158  | 0.0039455 | 0.0081923 |
| CV 10  | 0.020878  | 0.012829  | 0.027975  | 0.025753  | 0.009826  | 0.0086195 | 0.0067658 | 0.017567  | 0.025305  | 0.02682   |

**Table S3.8:** RP case study: NRMSE values for the cross-validation for each non-regularised fit to the fitting data. Here, CV denotes cross-validation data set and F denotes fitting data set.

|        | F 1       | F 2       | F 3       | F 4       | F 5       | F 6       | F 7       | F 8       | F 9       | F 10      |
|--------|-----------|-----------|-----------|-----------|-----------|-----------|-----------|-----------|-----------|-----------|
| All CV | 0.013751  | 0.0063153 | 0.00884   | 0.013575  | 0.013899  | 0.0078714 | 0.0059517 | 0.010741  | 0.022843  | 0.015516  |
| CV 1   | 0.012583  | 0.011669  | 0.013604  | 0.011654  | 0.013971  | 0.012114  | 0.011467  | 0.012384  | 0.017198  | 0.012536  |
| CV 2   | 0.0040153 | 0.0041922 | 0.0040289 | 0.0039908 | 0.0044718 | 0.0040891 | 0.0041888 | 0.0041068 | 0.0049564 | 0.0063077 |
| CV 3   | 0.003735  | 0.0078143 | 0.0038953 | 0.003637  | 0.0067991 | 0.0041322 | 0.0062124 | 0.012375  | 0.013713  | 0.018775  |
| CV 4   | 0.0064884 | 0.0044918 | 0.0081186 | 0.0060726 | 0.0083841 | 0.0046418 | 0.0045809 | 0.0048579 | 0.009421  | 0.0072704 |
| CV 5   | 0.0068183 | 0.0030585 | 0.0038377 | 0.006389  | 0.0083726 | 0.0034079 | 0.0030915 | 0.0036191 | 0.019308  | 0.0071956 |
| CV 6   | 0.012703  | 0.0034079 | 0.0030831 | 0.013105  | 0.012003  | 0.0039186 | 0.0033124 | 0.0041216 | 0.021459  | 0.011236  |
| CV 7   | 0.022215  | 0.0059678 | 0.010137  | 0.022083  | 0.021136  | 0.013575  | 0.0060142 | 0.013878  | 0.03472   | 0.014371  |
| CV 8   | 0.0074986 | 0.0051428 | 0.0058176 | 0.0055961 | 0.012635  | 0.0091876 | 0.0044004 | 0.021362  | 0.032742  | 0.022216  |
| CV 9   | 0.013894  | 0.0047527 | 0.01791   | 0.012572  | 0.016314  | 0.0048289 | 0.0047168 | 0.0047013 | 0.0157    | 0.006553  |
| CV 10  | 0.02664   | 0.0076313 | 0.0041814 | 0.027412  | 0.022659  | 0.0099254 | 0.006878  | 0.010276  | 0.035549  | 0.029736  |



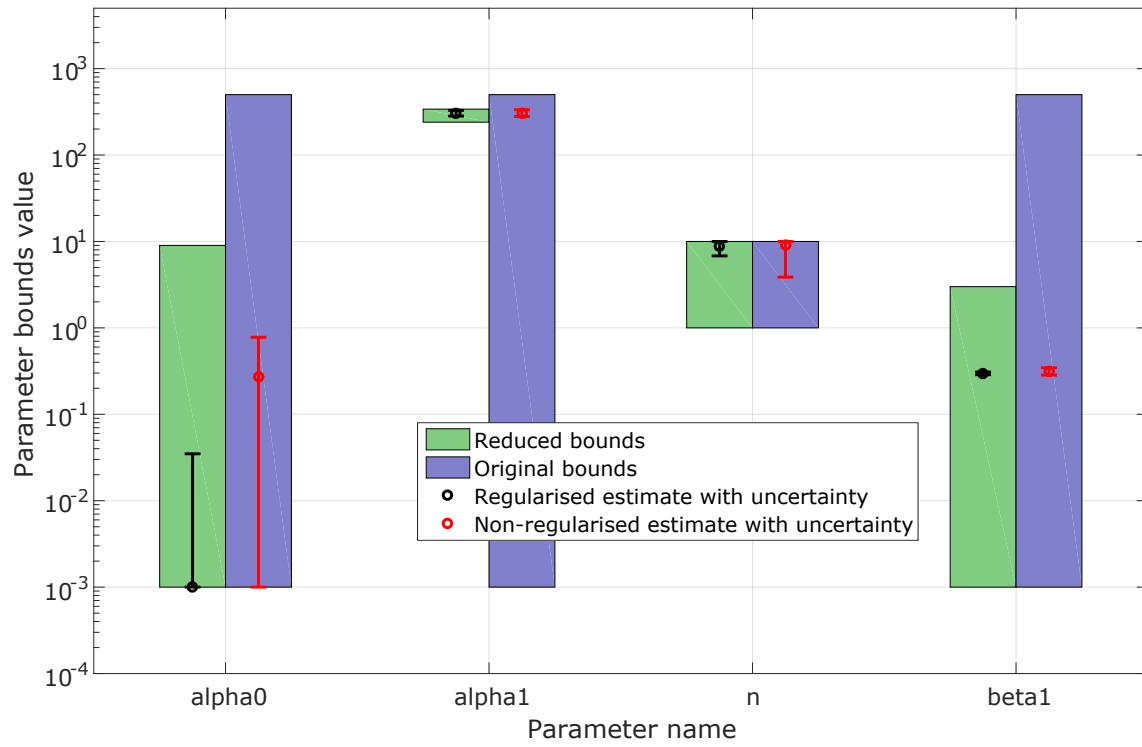

**Figure S3.14:** RP case study: reduction in the parameter bounds with the estimated values and their 95% confidence intervals for the first fitting data set.

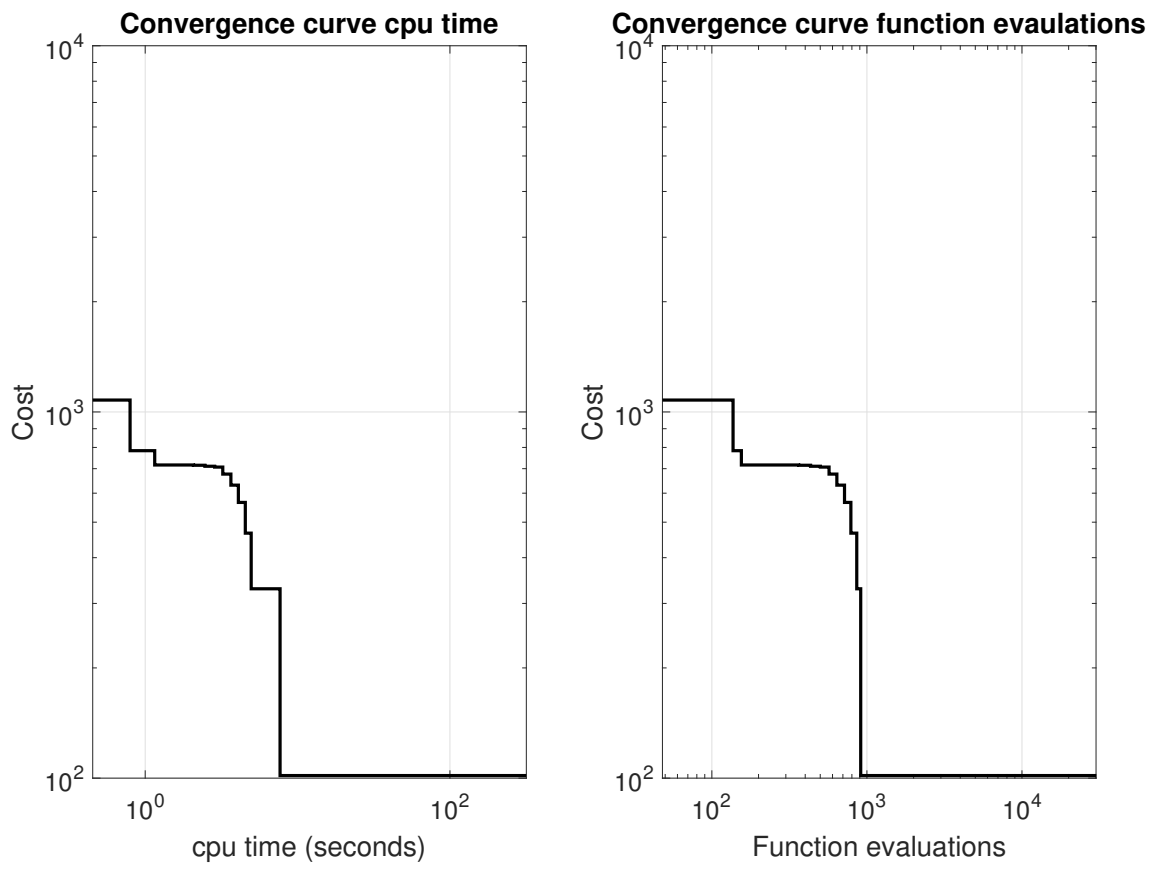

**Figure S3.15:** RP case study: convergence curve of the final regularised estimation for the first fitting data set.

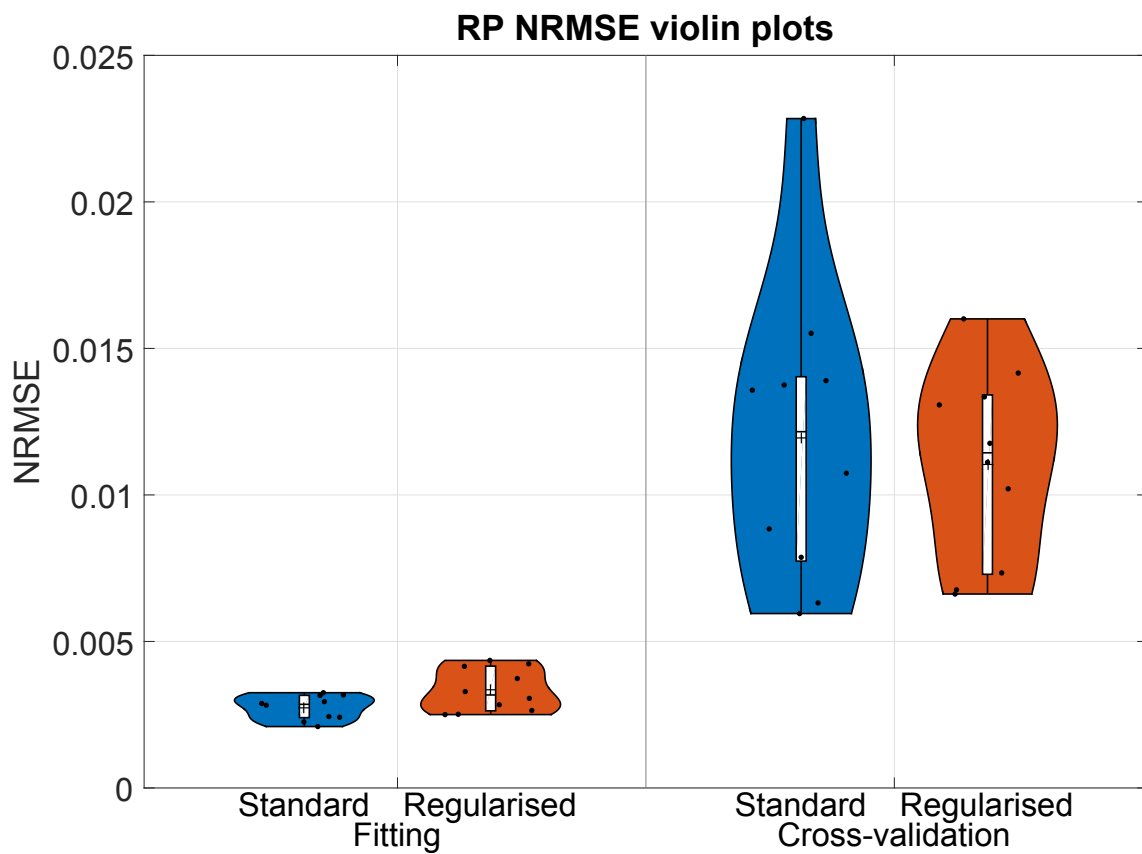

**Figure S3.16:** RP case study: violin plots showing the distribution of the NRMSE for the fit and cross-validation for all the data sets considered, both with and without regularisation.

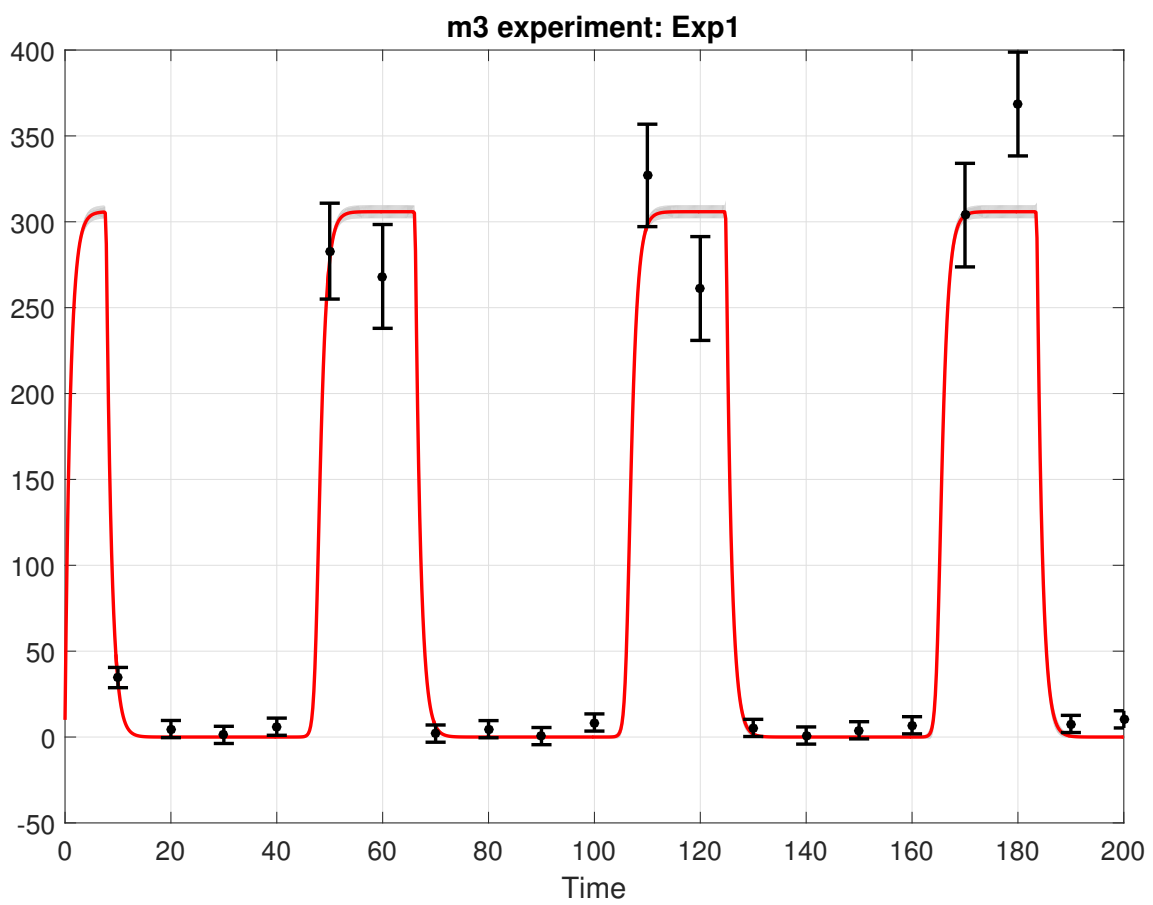

**Figure S3.17:** RP case study: final regularised fit with uncertainty intervals for the first fitting data set.

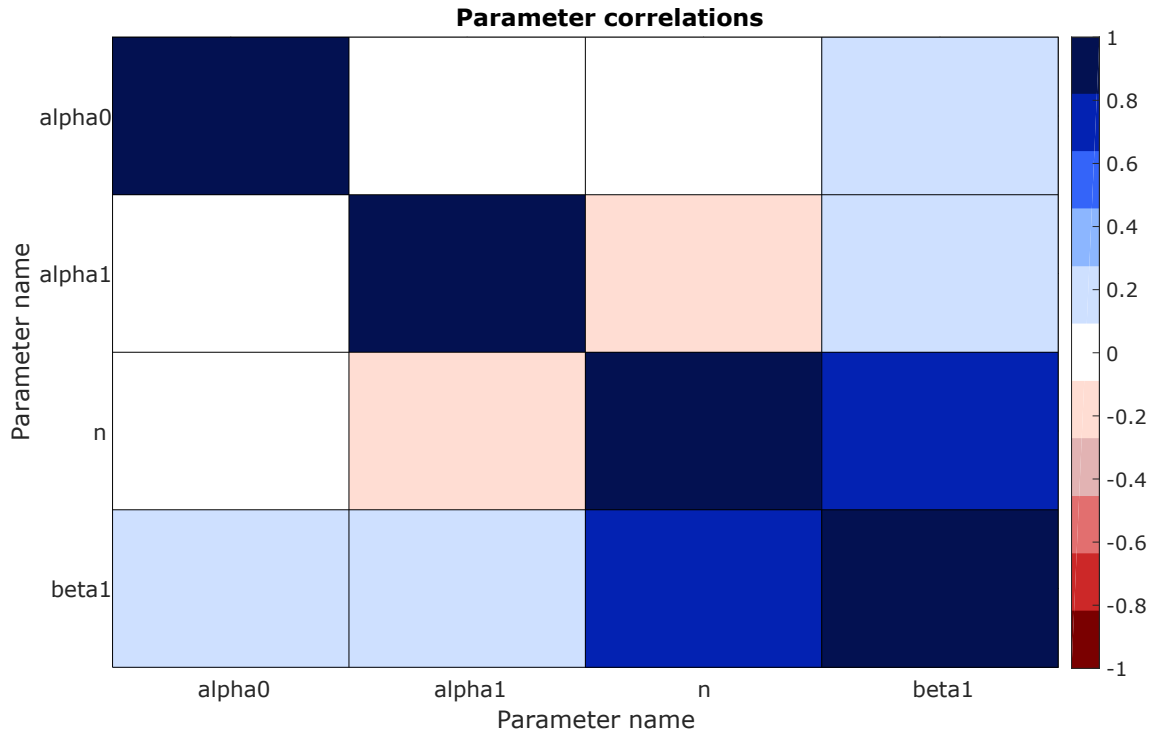

**Figure S3.18:** RP case study: parameter correlation matrix for the final estimated regularised solution for the first fitting data set.

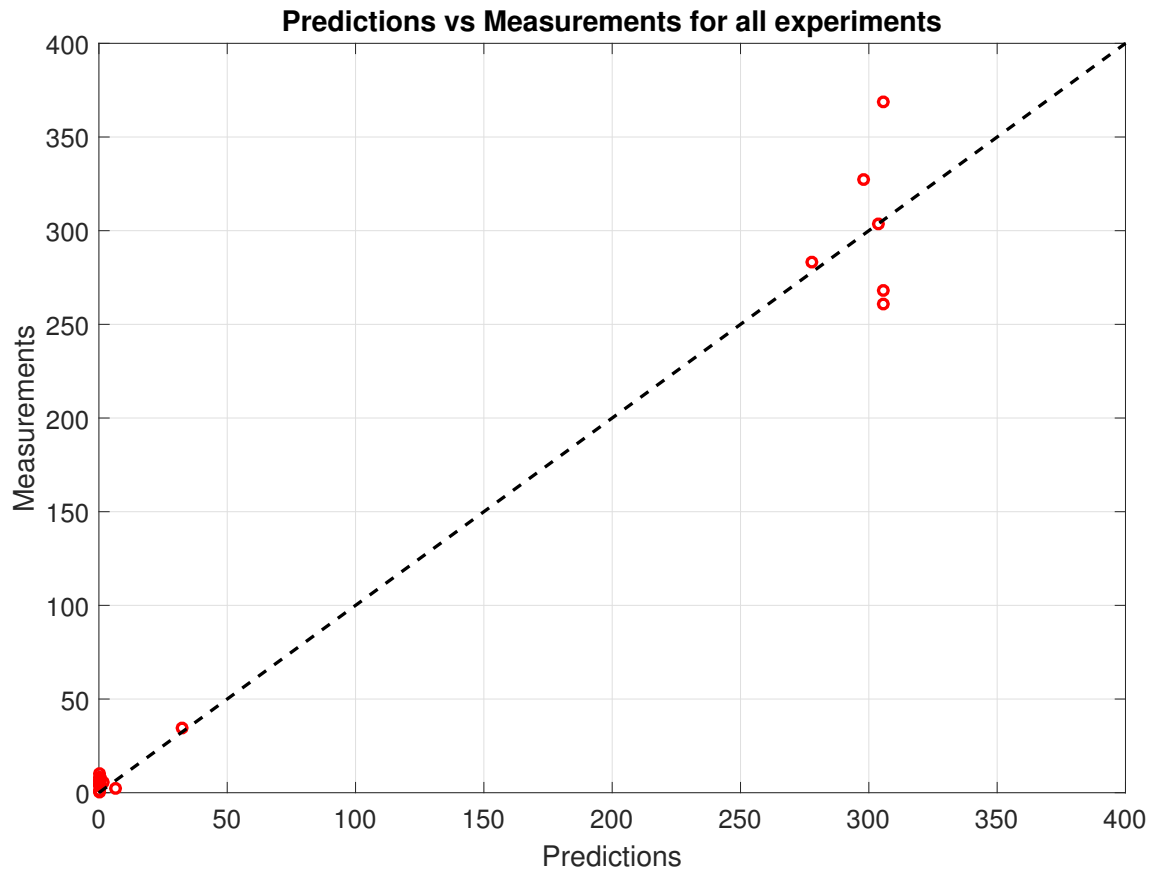

**Figure S3.19:** RP case study: predicted versus measured values for the first fitting data set.

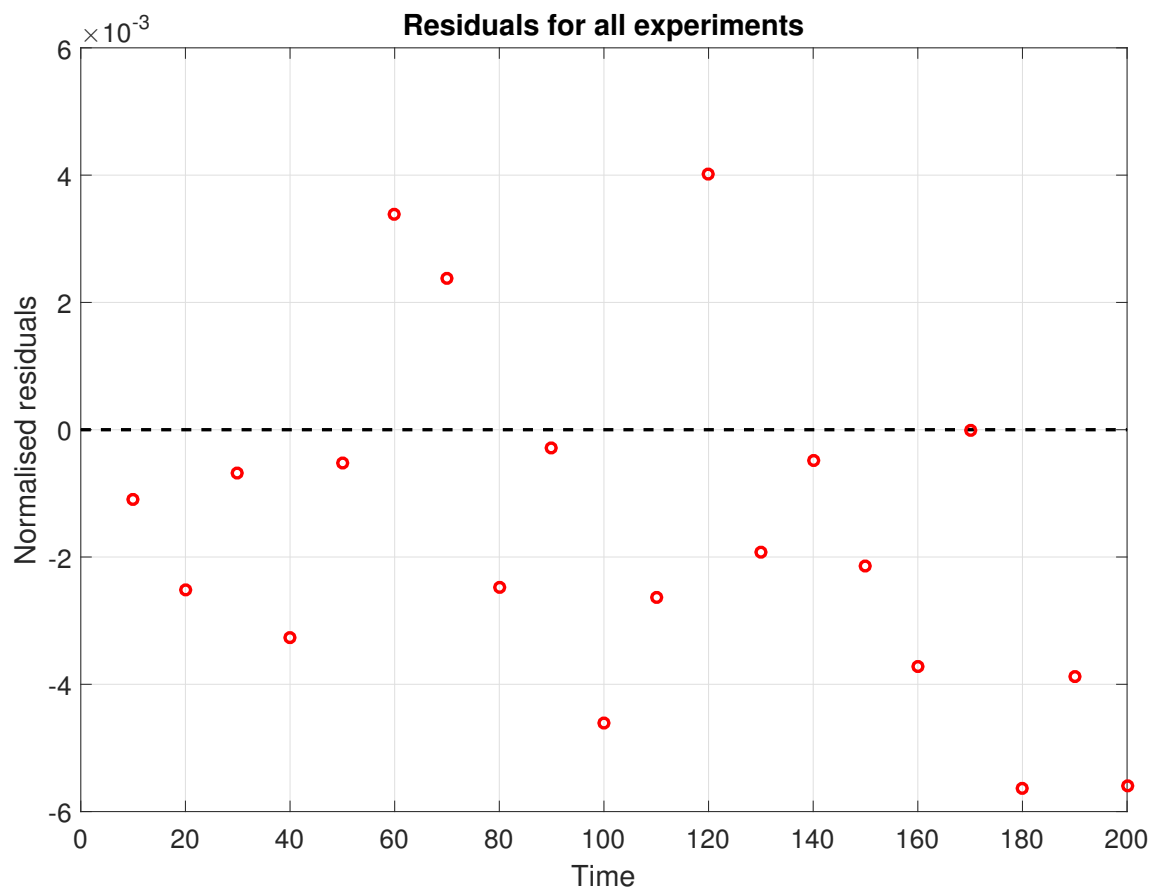

**Figure S3.20:** RP case study: normalised residuals for the regularised fit for the first fitting data set.

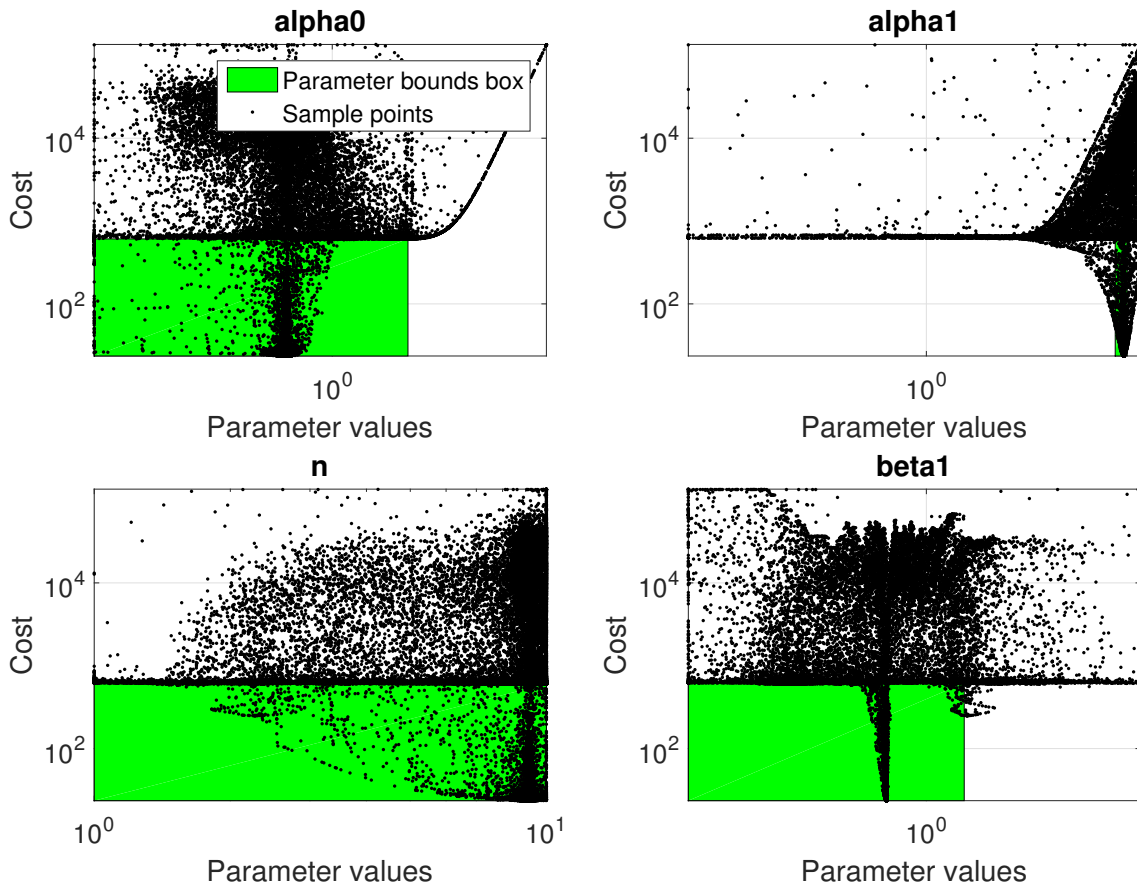

**Figure S3.21:** RP case study: sample from the initial estimation with the new parameter bound box, where the height of said box is the cost cut off for the first fitting data set.

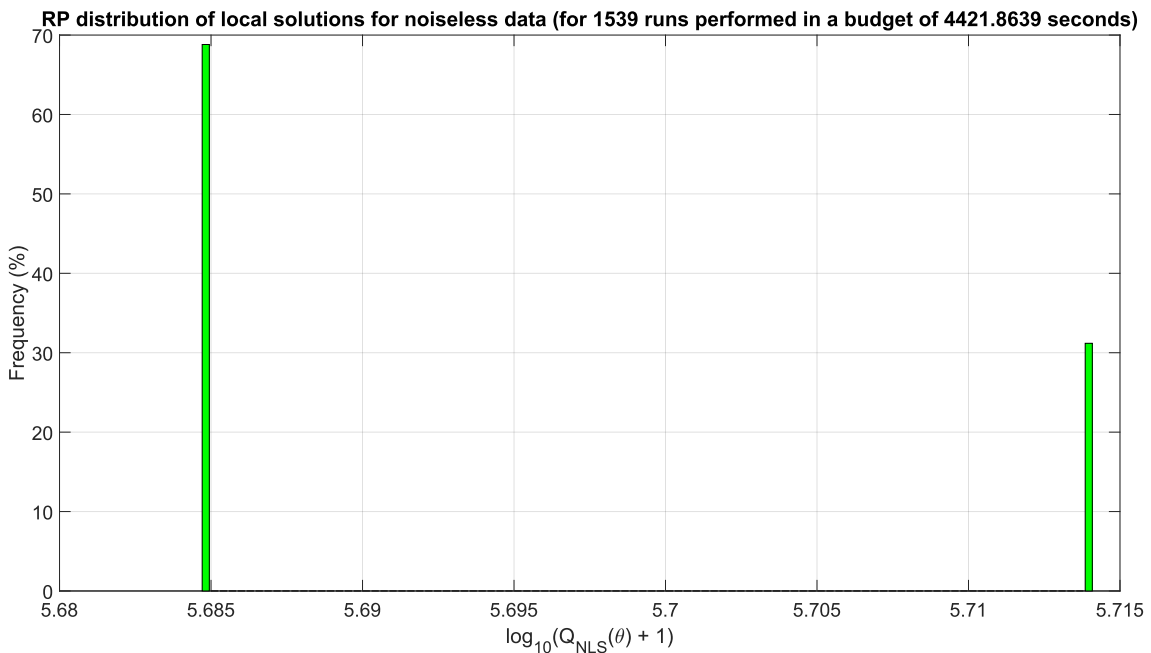

**Figure S3.22:** RP case study: distribution of solutions found using the nl2sol local solver fitting to noiseless data.

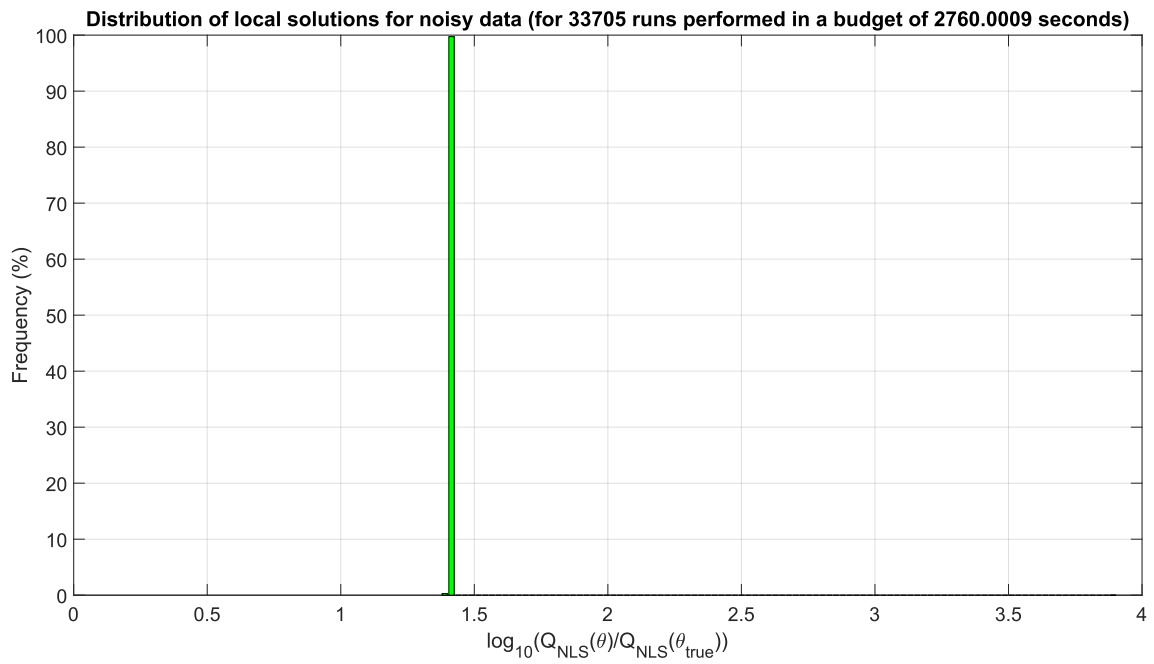

**Figure S3.23:** RP case study: distribution of solutions found using the nl2sol local solver fitting to noisy data for the first fitting data set.

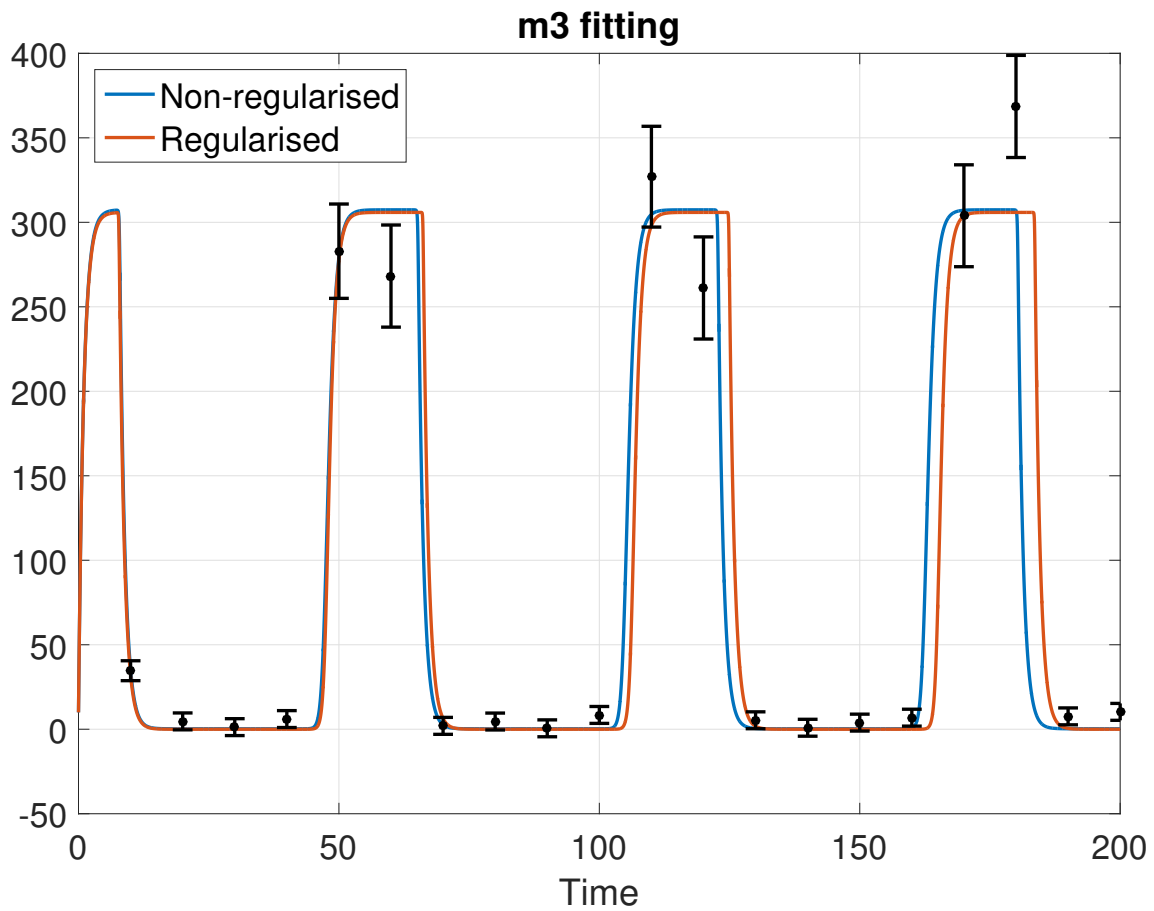

**Figure S3.24:** RP case study: comparison of the fits with and without regularisation for the first fitting data set.



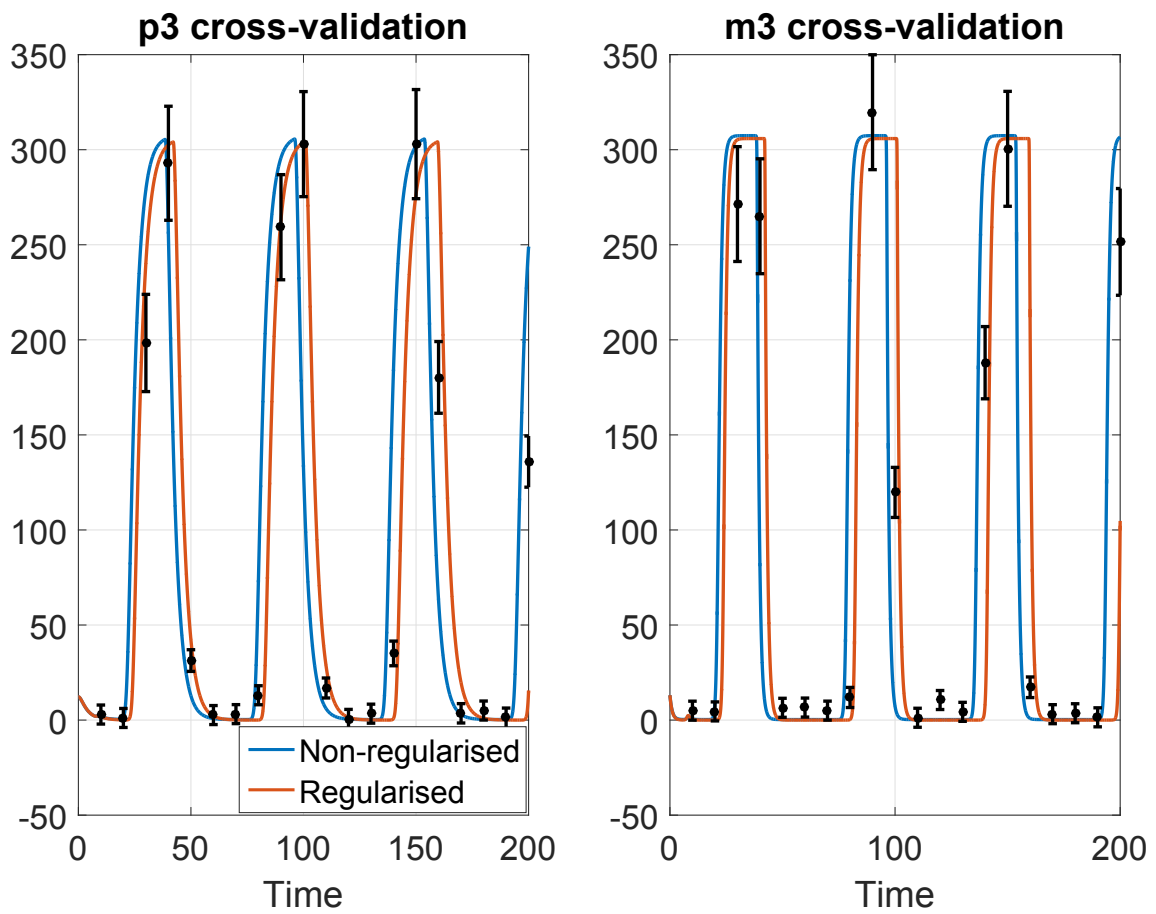

Figure S3.25: RP case study: comparison of the cross-validation with and without regularisation for the first fitting data set.

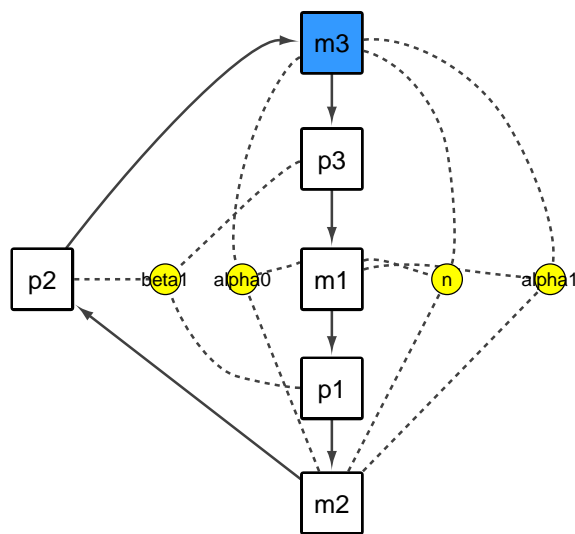

Figure S3.26: RP case study: comparison of the cross-validation with and without regularisation for the first fitting data set.

### S3.3 EO problem results

Detailed results for the EO case study can be found [here](#).

**Table S3.9:** EO case study: summary of the regularised results for the regularised fit to the first fitting experiment.

| Parameter      | Value   | Confidence (95%) | Coeff of variation (%) | Bounds status     |
|----------------|---------|------------------|------------------------|-------------------|
| $v_{Km1r1}$    | 0.3691  | $\pm 0.0401572$  | 5.55112                | Bounds not active |
| $L1r2$         | 14.2721 | $\pm 44.3378$    | 158.4996               | Bounds not active |
| $\sigma_{r2}$  | 1.3350  | $\pm 0.886679$   | 33.88626               | Bounds not active |
| $L2r3$         | 1.9281  | $\pm 13.7542$    | 363.9648               | Bounds not active |
| $d_{r3}$       | 7.9994  | $\pm 2.9484$     | 18.80504               | Bounds not active |
| $\sigma_{2r3}$ | 6       | $\pm 5.15811$    | 43.86151               | Bounds not active |
| $ks_{r4}$      | 2.1013  | $\pm 1.65248$    | 40.12207               | Bounds not active |

**Table S3.10:** EO case study: NRMSE values for the fitting for each fitting data set, with and without regularisation.

|                | Regularised | Non-regularised |
|----------------|-------------|-----------------|
| Fitting set 1  | 0.01618     | 0.015716        |
| Fitting set 2  | 0.007837    | 0.0077182       |
| Fitting set 3  | 0.0081427   | 0.007838        |
| Fitting set 4  | 0.010618    | 0.0045591       |
| Fitting set 5  | 0.0054577   | 0.0042112       |
| Fitting set 6  | 0.010091    | 0.0084268       |
| Fitting set 7  | 0.043215    | 0.037391        |
| Fitting set 8  | 0.021049    | 0.0088273       |
| Fitting set 9  | 0.025143    | 0.020857        |
| Fitting set 10 | 0.0088735   | 0.0064687       |

**Table S3.11:** EO case study: NRMSE values for the cross-validation for each regularised fit to the fitting data. Here, CV denotes cross-validation data set and F denotes fitting data set.

|        | F 1      | F 2       | F 3       | F 4      | F 5       | F 6      | F 7      | F 8      | F 9      | F 10     |
|--------|----------|-----------|-----------|----------|-----------|----------|----------|----------|----------|----------|
| All CV | 0.075949 | 0.041773  | 0.074722  | 0.11311  | 0.2159    | 0.16357  | 0.048767 | 0.069949 | 0.07087  | 0.091781 |
| CV 1   | 0.010495 | 0.0073621 | 0.010288  | 0.055885 | 0.063361  | 0.011585 | 0.031522 | 0.038265 | 0.033157 | 0.03294  |
| CV 2   | 0.19835  | 0.076991  | 0.15847   | 0.14053  | 0.34867   | 0.34051  | 0.064481 | 0.14309  | 0.18031  | 0.23738  |
| CV 3   | 0.024179 | 0.047758  | 0.023027  | 0.023362 | 0.1378    | 0.047815 | 0.037918 | 0.047011 | 0.0478   | 0.048011 |
| CV 4   | 0.012877 | 0.0095845 | 0.0096689 | 0.016139 | 0.0085784 | 0.010928 | 0.036482 | 0.04508  | 0.024547 | 0.030581 |
| CV 5   | 0.015042 | 0.012526  | 0.015787  | 0.054148 | 0.064641  | 0.013926 | 0.031876 | 0.04334  | 0.033136 | 0.032888 |
| CV 6   | 0.011184 | 0.0223    | 0.020721  | 0.023283 | 0.067129  | 0.023689 | 0.035123 | 0.019457 | 0.028716 | 0.022605 |
| CV 7   | 0.11098  | 0.048859  | 0.036935  | 0.083606 | 0.15534   | 0.16512  | 0.041104 | 0.047357 | 0.063121 | 0.1218   |
| CV 8   | 0.066309 | 0.067321  | 0.16432   | 0.28146  | 0.51942   | 0.34567  | 0.098093 | 0.12307  | 0.067199 | 0.067379 |
| CV 9   | 0.01584  | 0.014522  | 0.014766  | 0.059726 | 0.072066  | 0.016461 | 0.03176  | 0.042572 | 0.034571 | 0.035993 |
| CV 10  | 0.012739 | 0.036204  | 0.027003  | 0.10492  | 0.11695   | 0.036063 | 0.035935 | 0.035893 | 0.045926 | 0.036079 |

**Table S3.12:** EO case study: NRMSE values for the cross-validation for each non-regularised fit to the fitting data. Here, CV denotes cross-validation data set and F denotes fitting data set.

|        | F 1       | F 2       | F 3       | F 4       | F 5       | F 6       | F 7      | F 8       | F 9      | F 10      |
|--------|-----------|-----------|-----------|-----------|-----------|-----------|----------|-----------|----------|-----------|
| All CV | 0.12834   | 0.040675  | 0.068498  | 0.17703   | 0.23943   | 0.19182   | 0.048399 | 0.086123  | 0.10175  | 0.13844   |
| CV 1   | 0.0078941 | 0.0076341 | 0.0082981 | 0.062903  | 0.0068656 | 0.065486  | 0.033209 | 0.032536  | 0.038088 | 0.054944  |
| CV 2   | 0.22338   | 0.077549  | 0.14615   | 0.25931   | 0.46443   | 0.30199   | 0.078843 | 0.20939   | 0.1598   | 0.16492   |
| CV 3   | 0.072992  | 0.047717  | 0.075537  | 0.046739  | 0.11988   | 0.11796   | 0.048357 | 0.13418   | 0.041548 | 0.026543  |
| CV 4   | 0.0103    | 0.010541  | 0.0092106 | 0.0087533 | 0.019601  | 0.0097001 | 0.040514 | 0.0096242 | 0.026578 | 0.032316  |
| CV 5   | 0.011825  | 0.012733  | 0.012482  | 0.061876  | 0.012746  | 0.070974  | 0.034511 | 0.033156  | 0.036845 | 0.055268  |
| CV 6   | 0.012605  | 0.022573  | 0.022117  | 0.067082  | 0.014338  | 0.059174  | 0.0408   | 0.022621  | 0.030608 | 0.0088072 |
| CV 7   | 0.020195  | 0.048913  | 0.03302   | 0.11964   | 0.022308  | 0.12665   | 0.050023 | 0.049515  | 0.07295  | 0.081966  |
| CV 8   | 0.32878   | 0.067523  | 0.13123   | 0.43853   | 0.5843    | 0.46659   | 0.064643 | 0.067231  | 0.24315  | 0.3618    |
| CV 9   | 0.013482  | 0.014178  | 0.014267  | 0.094821  | 0.01336   | 0.070209  | 0.035888 | 0.035598  | 0.050558 | 0.085043  |
| CV 10  | 0.018098  | 0.016118  | 0.02321   | 0.12639   | 0.018409  | 0.10603   | 0.036072 | 0.036347  | 0.069487 | 0.10817   |

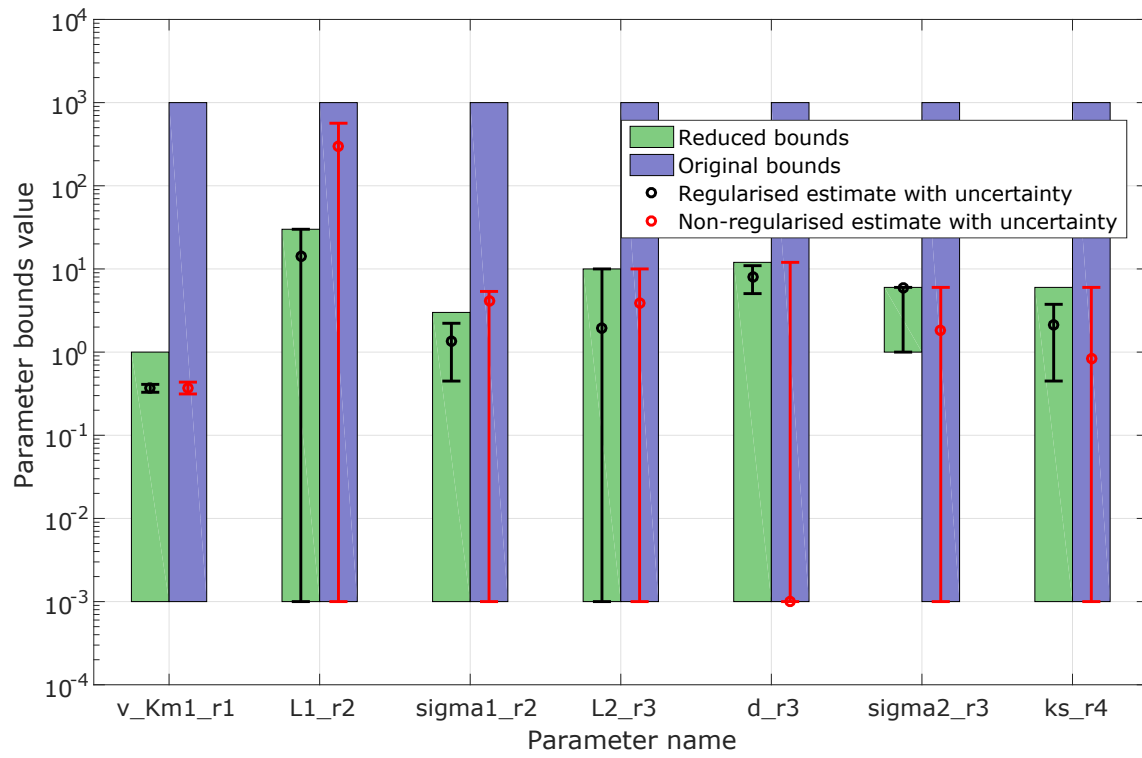

**Figure S3.27:** EO case study: reduction in the parameter bounds with the estimated values and their 95% confidence intervals for the first fitting data set.

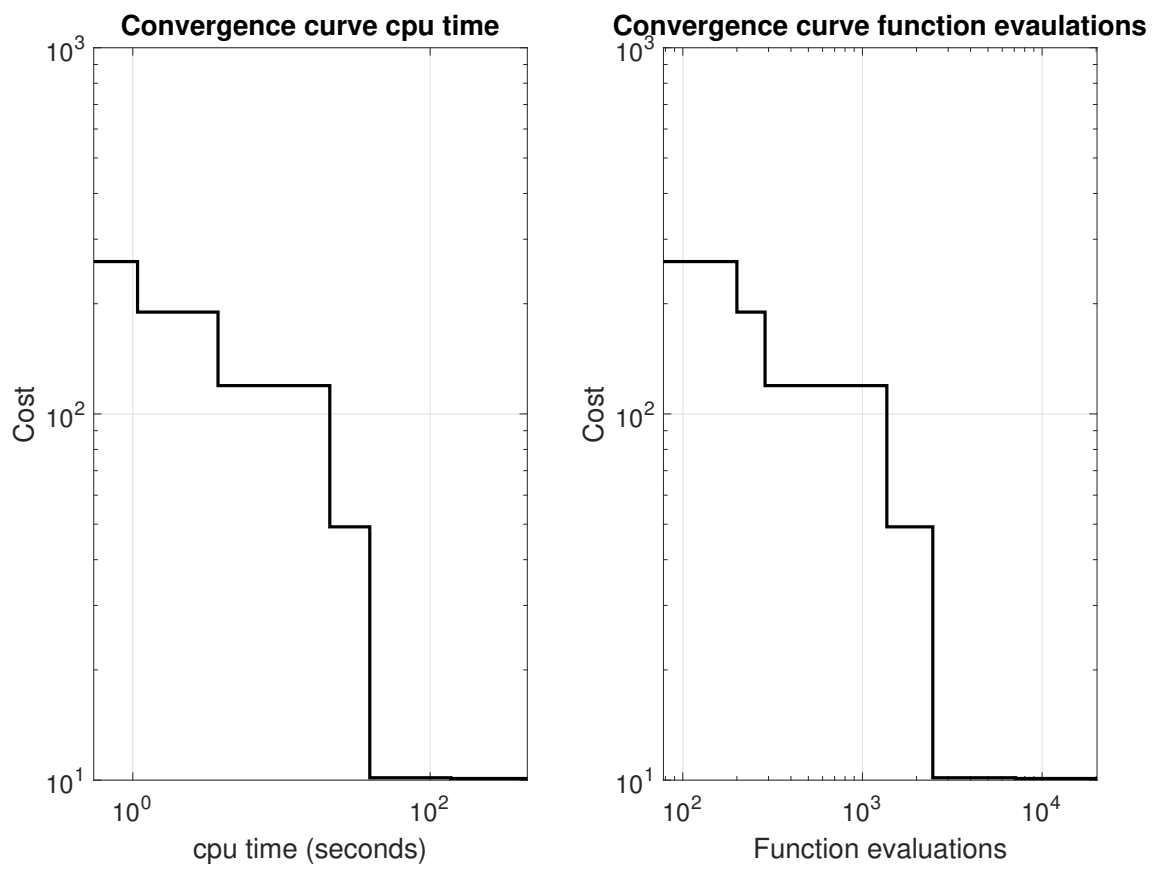

**Figure S3.28:** EO case study: convergence curve of the final regularised estimation for the first fitting data set.

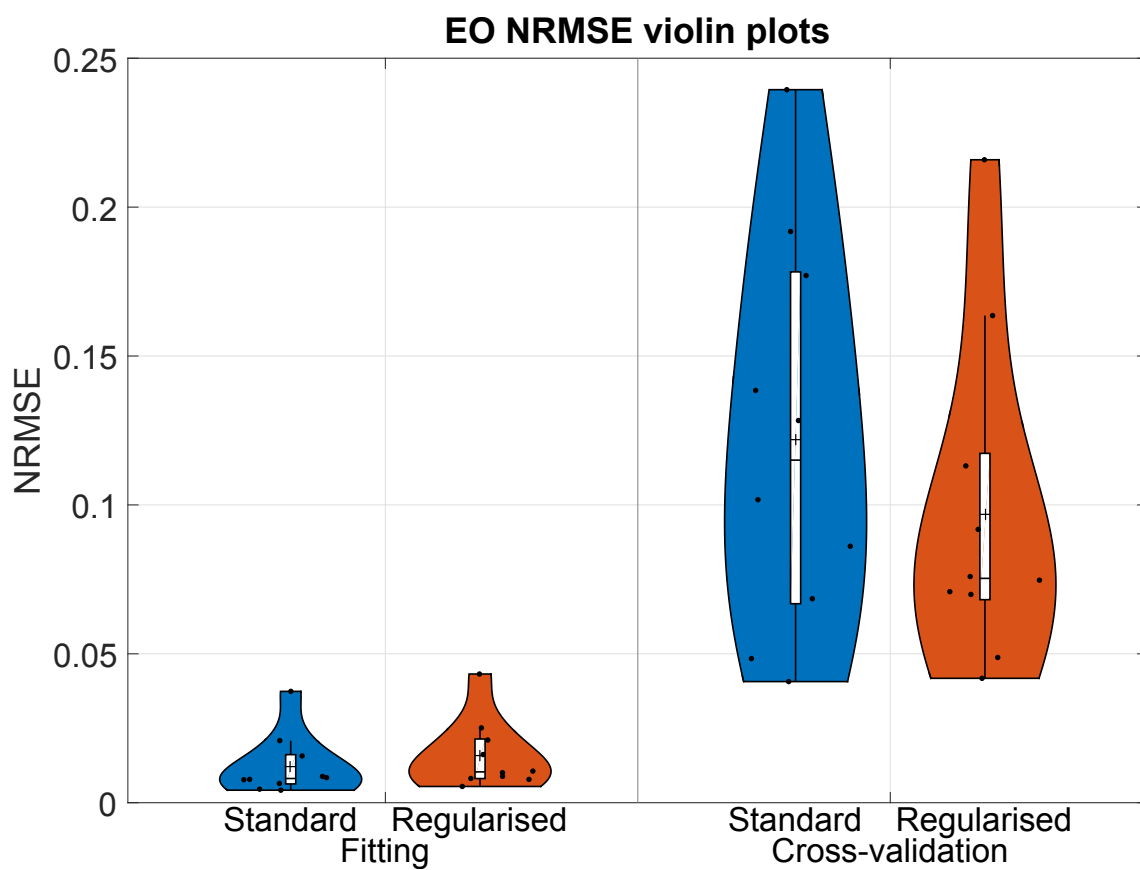

**Figure S3.29:** EO case study: violin plots showing the distribution of the NRMSE for the fit and cross-validation for all the data sets considered, both with and without regularisation.

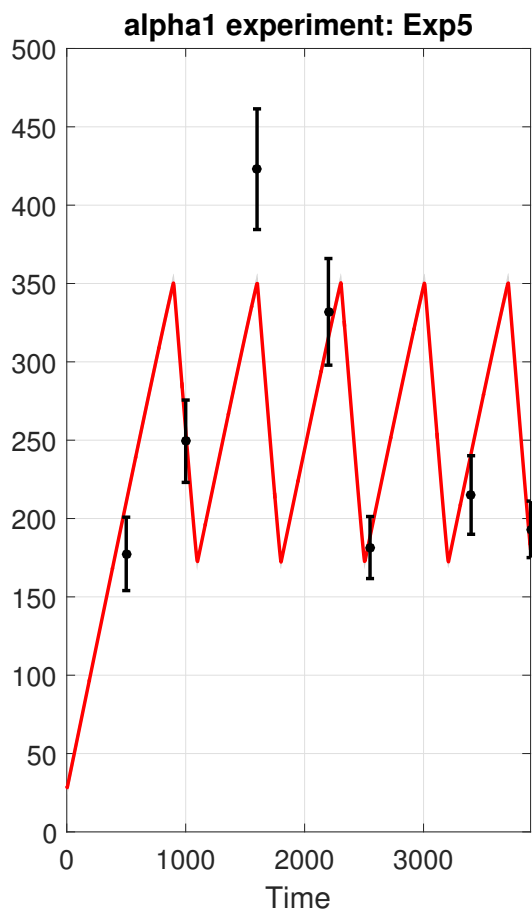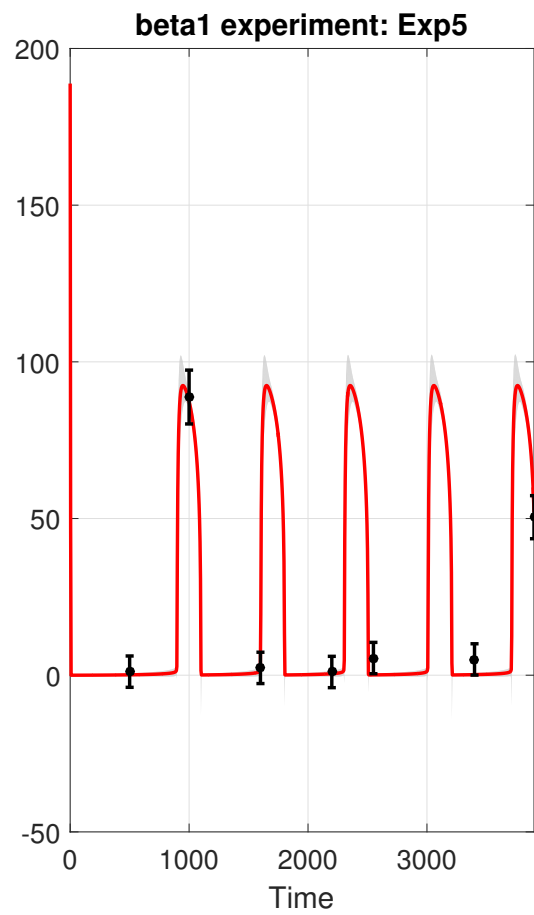

**Figure S3.30:** EO case study: final regularised fit with uncertainty intervals for the first fitting data set.



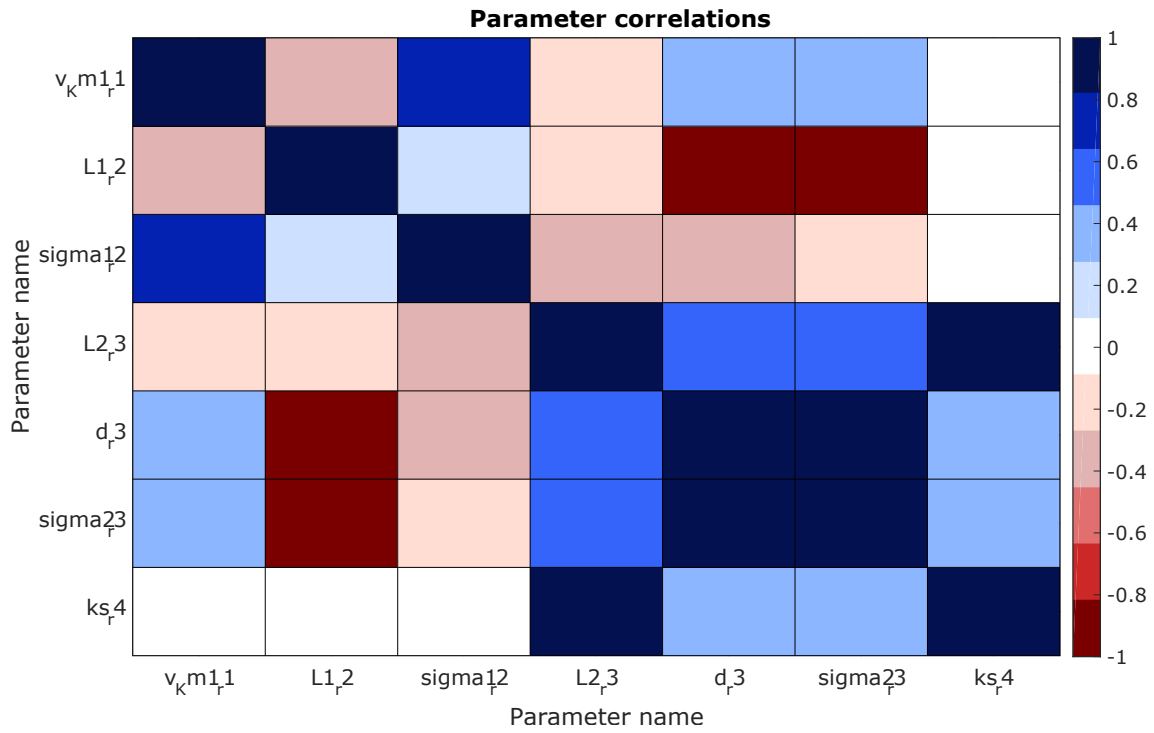

**Figure S3.31:** EO case study: final regularised fit with uncertainty intervals for the first fitting data set.

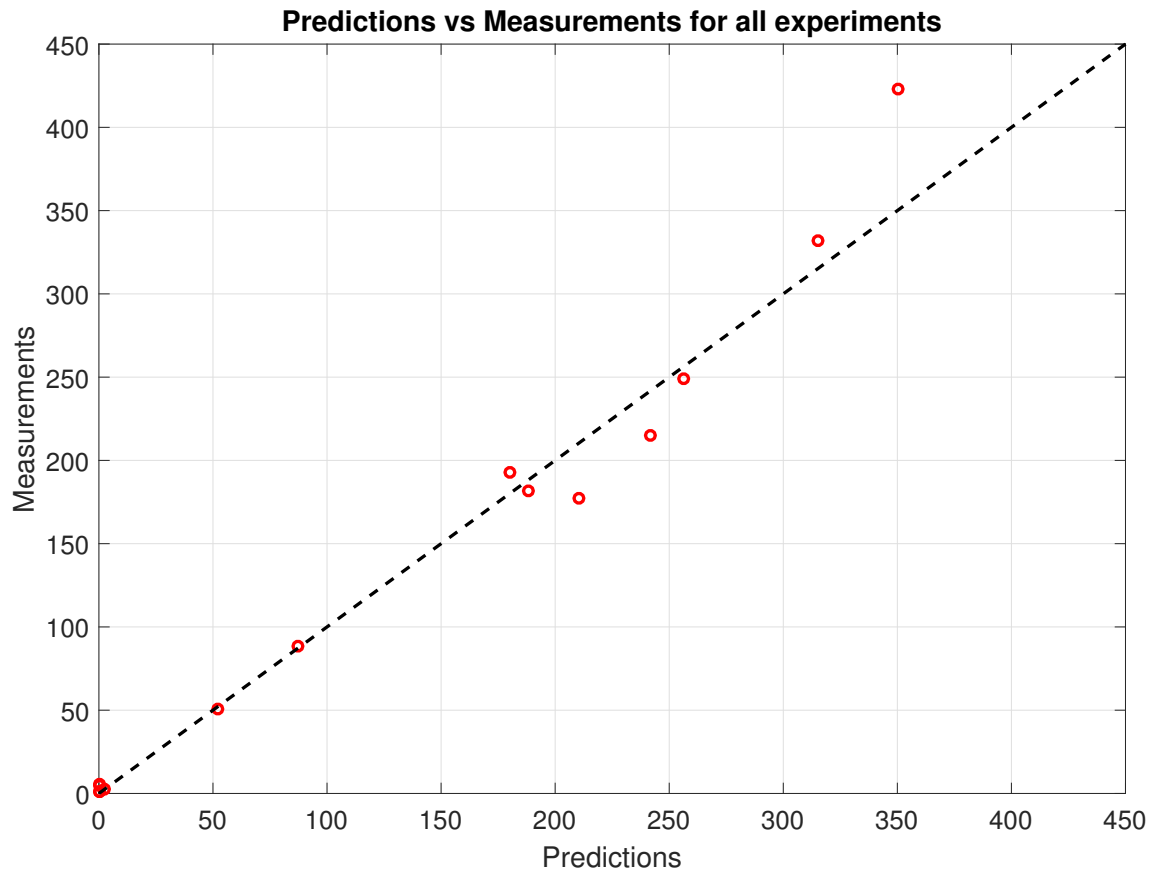

**Figure S3.32:** EO case study: predicted versus measured values for the first fitting data set.

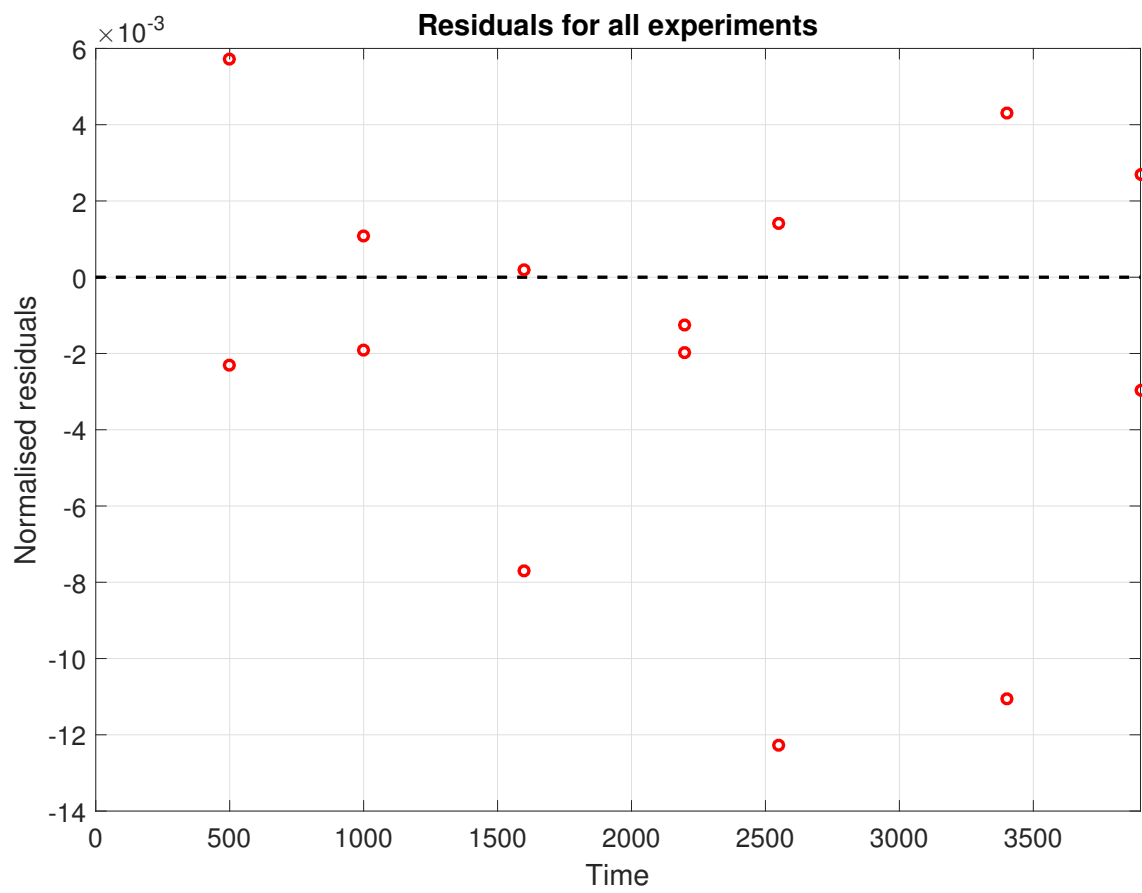

**Figure S3.33:** EO case study: normalised residuals for the regularised fit for the first fitting data set.

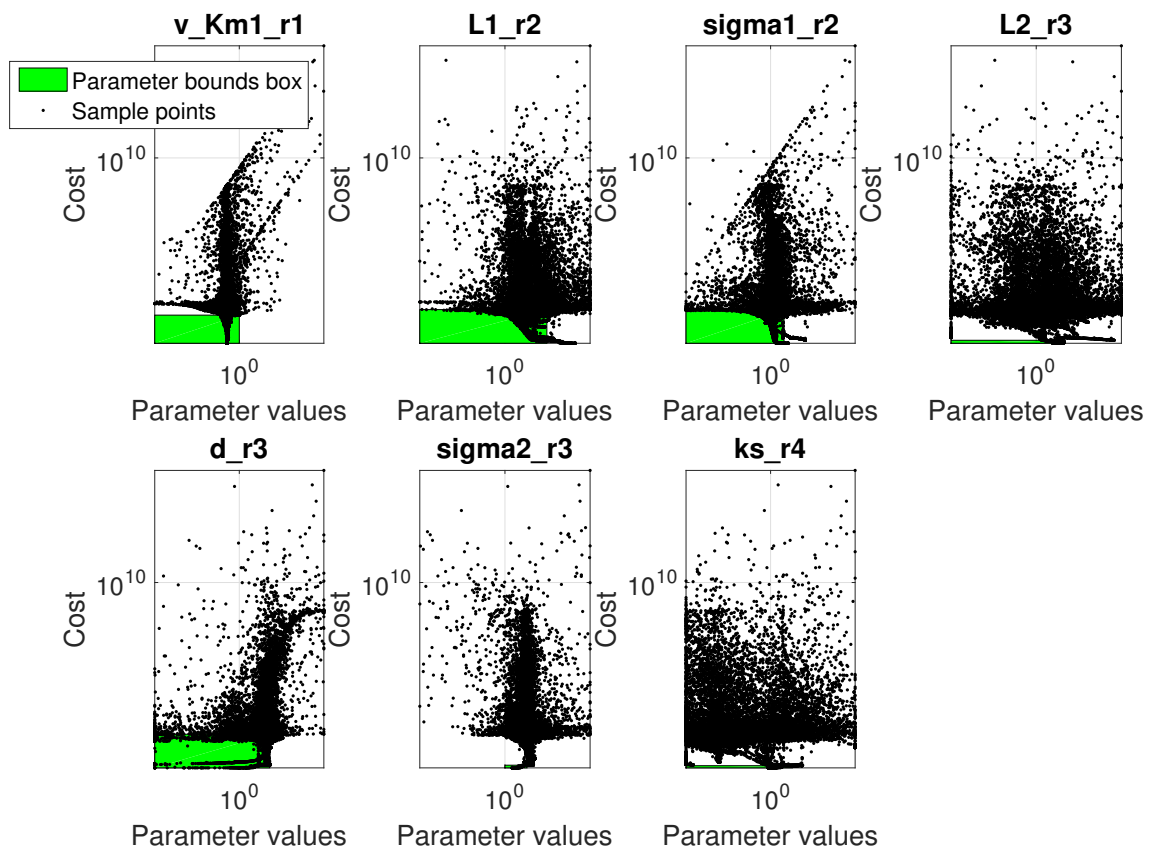

**Figure S3.34:** EO case study: sample from the initial estimation with the new parameter bound box, where the height of said box is the cost cut off for the first fitting data set.

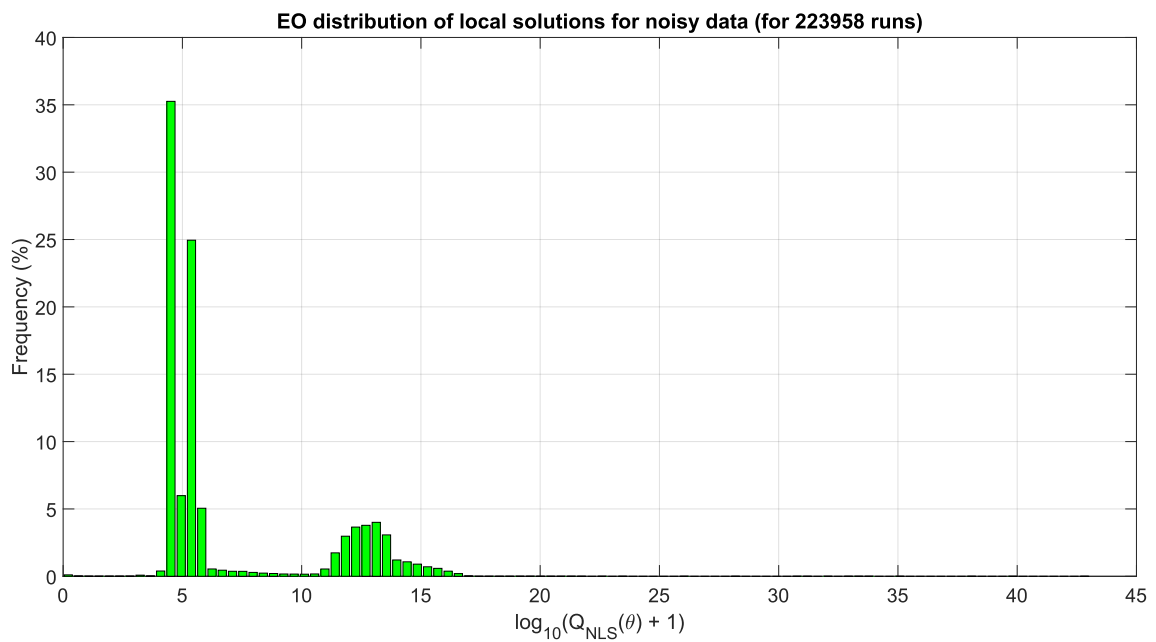

**Figure S3.35:** EO case study: distribution of solutions found using the nl2sol local solver fitting to noiseless data.

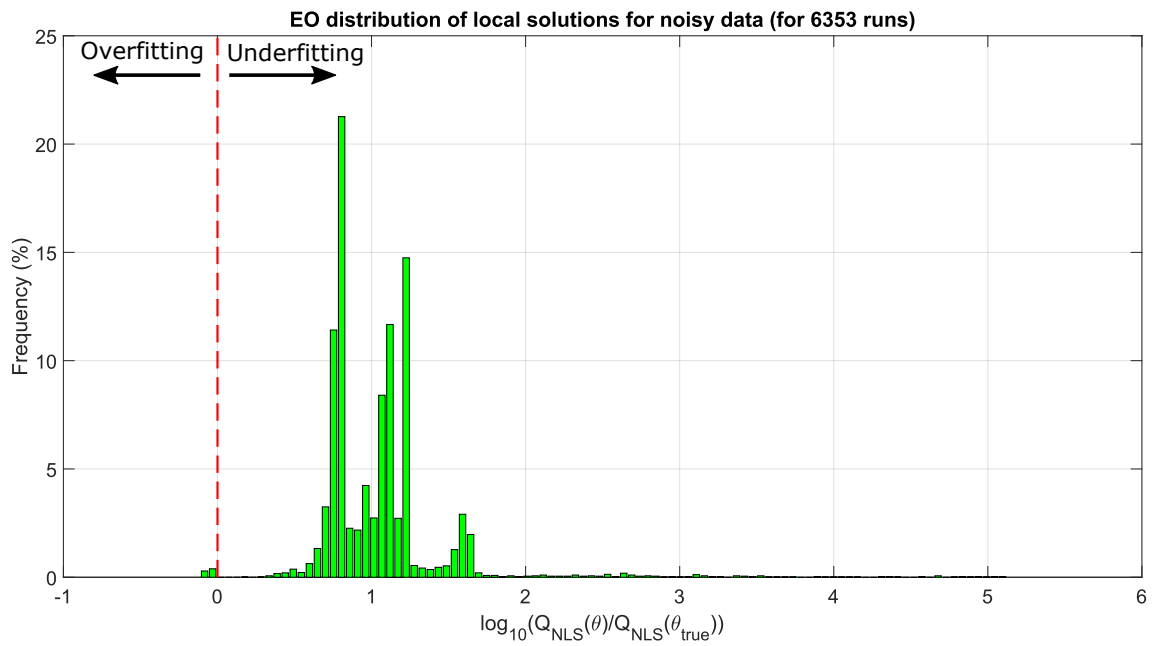

**Figure S3.36:** EO case study: distribution of solutions found using the nl2sol local solver fitting to noisy data for the first fitting data set.

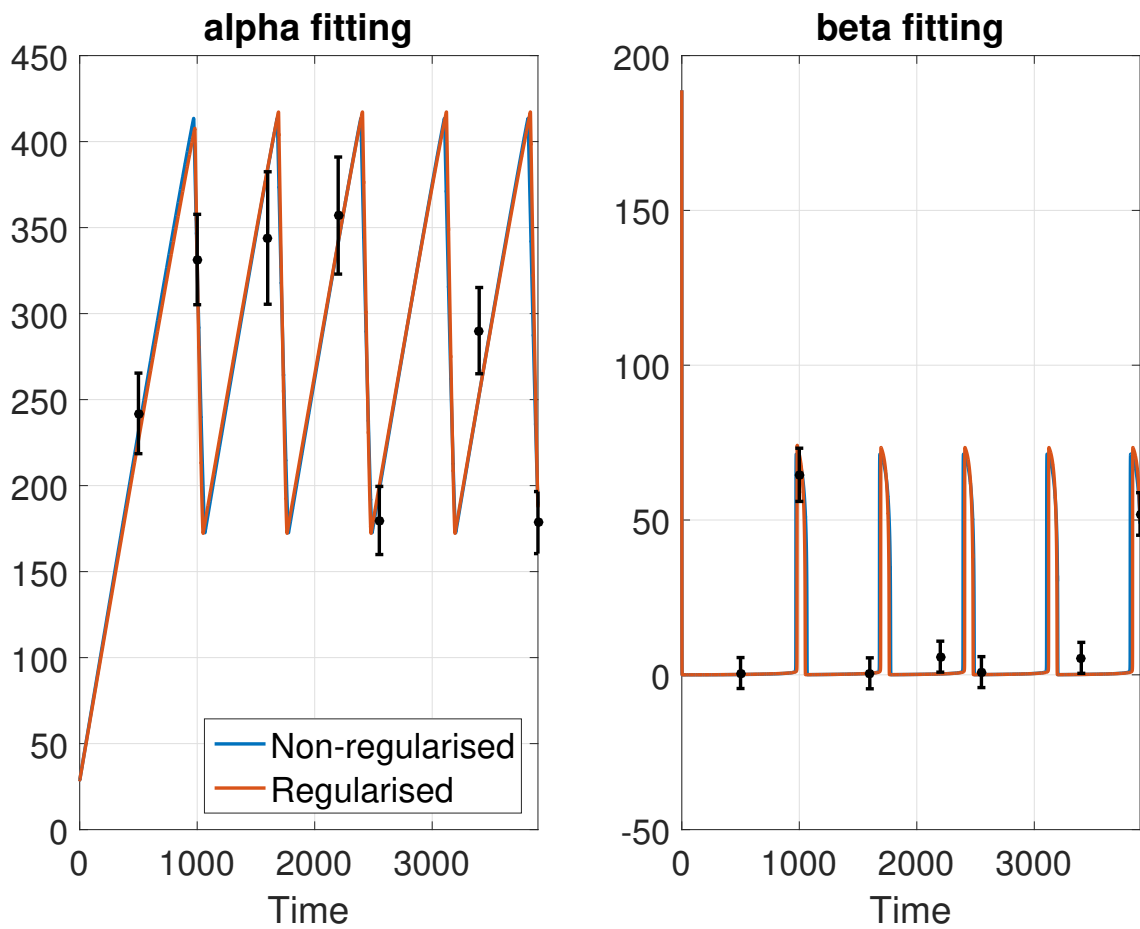

**Figure S3.37:** EO case study: comparison of the fits with and without regularisation for the first fitting data set.

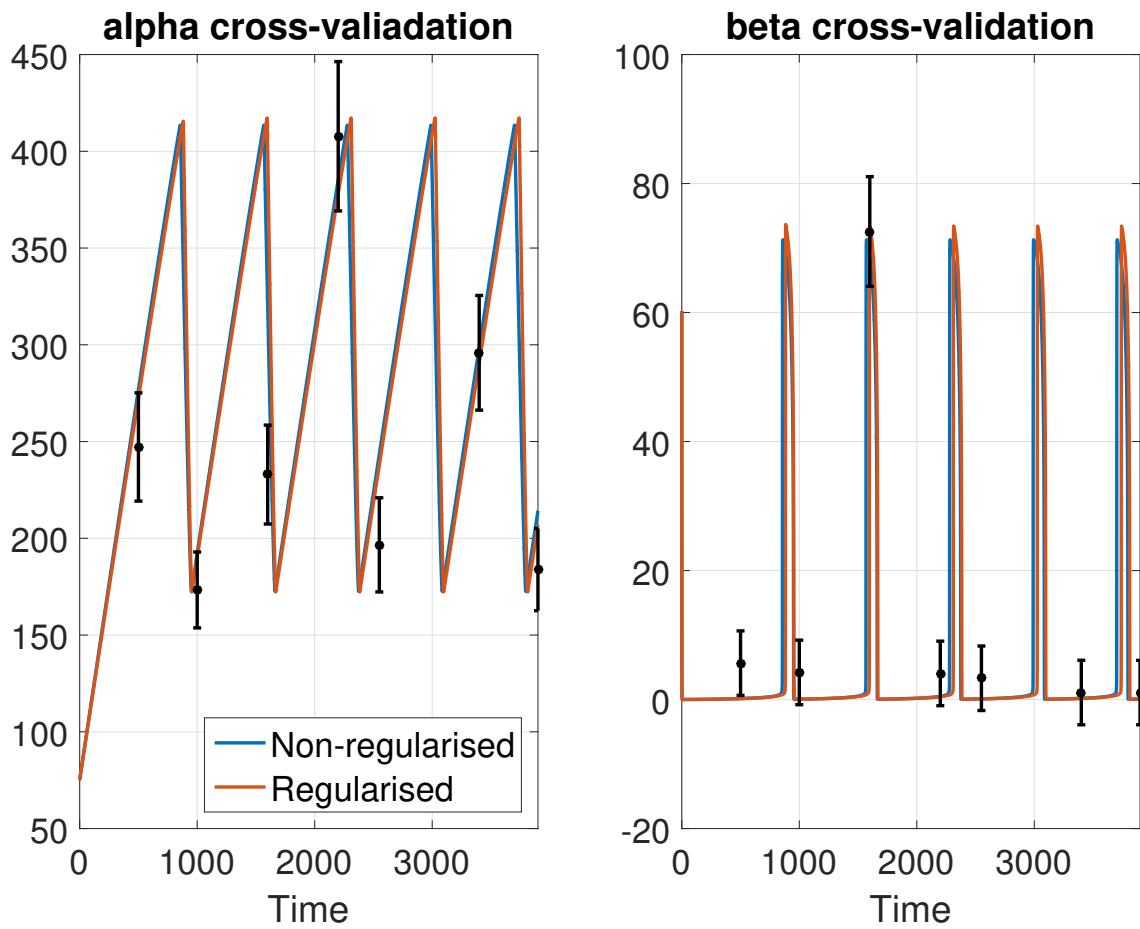

**Figure S3.38:** EO case study: comparison of the cross-validation with and without regularisation for the fit to the first fitting data set.

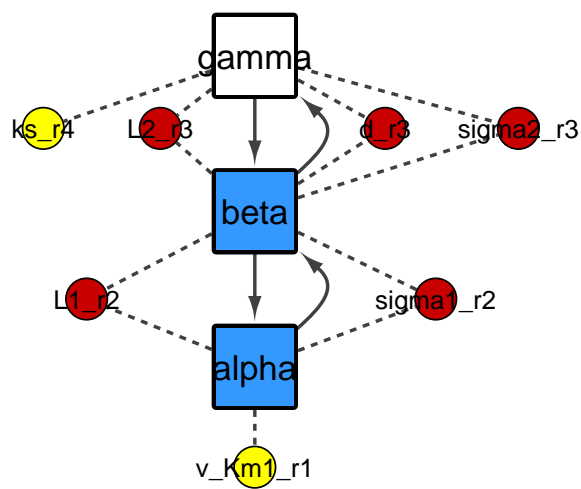

**Figure S3.39:** EO case study: results of the VisId analysis performed at the regularised solution for the first fitting data set.
